1 **Key Drivers of Ecological Assembly in the Hindgut of Atlantic Cod (*Gadus morhua*)**  
2 **when Fed with a Macroalgal Supplemented diet – How Robust Is the Gut to**  
3 **Taxonomic Perturbation?**

4 C. Keating<sup>1,2,3</sup>, M. Bolton-Warberg<sup>4</sup>, J. Hinchcliffe<sup>5</sup>, R. Davies<sup>6</sup>, S. Whelan<sup>4</sup>, A. H. L.  
5 Wan<sup>7,8</sup>, R. D. Fitzgerald<sup>4</sup>, S. J. Davies<sup>9</sup>, C. J. Smith<sup>1,2</sup>, U. Z. Ijaz<sup>2#</sup>

6 <sup>1</sup>Division of Microbiology, School of Natural Sciences, National University of Ireland  
7 Galway, Ireland, H91 TK33.

8 <sup>2</sup>Water and Environment Group, Infrastructure and Environment Division, James Watt  
9 School of Engineering, University of Glasgow, Glasgow, United Kingdom, G12 8LT.

10 <sup>3</sup>Institute of Biodiversity, Animal Health & Comparative Medicine, University of Glasgow,  
11 Glasgow G12 8QQ, UK

12 <sup>4</sup>Carna Research Station, Ryan Institute, National University of Ireland Galway, Carna, Co.  
13 Galway, Ireland, H91 V8Y1.

14 <sup>5</sup>Department of Biological and Environmental Sciences, University of Gothenburg,  
15 Gothenburg, Sweden.

16 <sup>6</sup>AquaBioTech Group, Central Complex, Naggar Street, Targa Gap, Mosta, MST 1761,  
17 Malta G.C.

18 <sup>7</sup>Irish Seaweed Research Group, Ryan Institute and School of Natural Sciences, National  
19 University of Ireland Galway, Ireland, H91 TK33.

20 <sup>8</sup>Aquaculture and Nutrition Research Unit, Carna Research Station, Ryan Institute and  
21 School of Natural Sciences, National University of Ireland Galway, Carna, Co. Galway,  
22 Ireland, H91 V8Y1.

23 <sup>9</sup>Department of Animal Production, Welfare and Veterinary Science, Harper Adams  
24 University, Newport, Shropshire, UK, TF10 8NB.

25

26 # Corresponding Author: [Umer.Ijaz@glasgow.ac.uk](mailto:Umer.Ijaz@glasgow.ac.uk)

27 **Abstract**

28 The microbiota in the gastrointestinal tract of any species is shaped by internal and  
29 external cues in addition to random events which can be difficult to disentangle from a  
30 range of interacting variables. Estimating ecological assembly processes can help  
31 elucidate these factors. In our study, farmed Atlantic cod (*Gadus morhua*) were fed a diet  
32 of 10% macroalgae supplement (*Ulva rigida* species [ULVA] or *Ascophyllum nodosum*  
33 [ASCO] or a non-amended control diet [CTRL]) over a 12-week period and the ecological  
34 assembly processes quantified. The CTRL samples showed selection (variable selection -  
35 divergence in communities related to selective environmental conditions) as a key  
36 assembly process, while dispersal limitation (limited movement results in divergent  
37 communities through stochastic processes) was a driver of the gut microbiome for fish fed  
38 the macroalgae supplemented diet at Week 12 (i.e., ASCO and ULVA). Fish from the  
39 ASCO grouping diverged into ASCO\_N (normal) and ASCO\_LG (lower growth), where  
40 ASCO\_LG individuals found the diet unpalatable. The recruitment of new taxa over time  
41 was altered in the ASCO\_LG fish, with the gut microbiome showing phylogenetic under  
42 dispersion (nepotistic recruitment of species). Finally, the gut microbiome (CTRL and  
43 ULVA only) showed increasing robustness to taxonomic disturbance over time and an  
44 increase in functional redundancy. This study advances our understanding of the  
45 ecological assembly and succession in the hindgut of juvenile Atlantic cod across dietary  
46 regimes. Understanding the processes driving ecological assembly in the gut microbiome,  
47 in fish research specifically, could allow us to manipulate the microbiome for improved  
48 health or resilience to disease for improved aquaculture production.

49

50

51

52

53

54

55

56

57

58

59

## 60 **1. Introduction**

61 Aquaculture has become the fastest-growing food sector this century, surpassing over 82  
62 million tonnes in seafood production in 2018<sup>1</sup> with its contribution to global seafood  
63 production exceeding 45%<sup>1</sup>. At present, however, Atlantic cod (*Gadus morhua*) is primarily  
64 harvested through capture fisheries owing to species-specific production bottlenecks in  
65 aquaculture, leading to reduced profitability<sup>2,3</sup>. Such bottlenecks include poor larval  
66 survival rates<sup>4</sup>, early sexual maturation (reduced fillet yield)<sup>5</sup>, and reduced fish growth<sup>6</sup>. A  
67 review of these challenges is noted here<sup>7</sup>. An avenue that is being increasingly explored is  
68 the addition of aquafeed ingredients that provide additional health benefits to the growing  
69 fish from a variety of natural sources (e.g., macroalgae supplements<sup>8–10</sup>,  
70 immunostimulants<sup>11,12</sup>, pre- and probiotics<sup>13,14</sup>). In conjunction with such diet supplements,  
71 it is apparent that the impact of these feeds on the gut microbiome and fish health should  
72 be considered.

73  
74 The fish gut microbiome is increasingly being investigated to elucidate fish condition<sup>15</sup>,  
75 response to environmental conditions<sup>16</sup> and changing diet<sup>17,18</sup> and has been extensively  
76 reviewed elsewhere<sup>15,19,20</sup>. The cod gut microbiome in wild populations has been shown to  
77 have limited microbial diversity and a high prevalence of closely related species of  
78 microflora, such as *Photobacterium*, in wild populations<sup>21,22</sup>. In our previous work, we have  
79 shown that there was high diversity in the gut microbiome of farmed juvenile cod  
80 monitored over a 12 week period<sup>23</sup>, and while we also reported a high incidence of  
81 *Photobacterium* in the hindgut we observed a temporal decrease in *Photobacterium*  
82 relative abundance without indications of any environmental cause. It is unclear if this shift  
83 was a result of natural community succession in the developing hindgut microbiome of  
84 juvenile farmed fish or some other factor. Little is known about the gut microbiome  
85 development in cod, with the limited number of studies having only reported on the larval  
86 phase<sup>24</sup> or wild adults<sup>21</sup>. Moreover, the microbial community assembly mechanisms  
87 themselves remain underexplored. Exploration of these mechanisms may offer a realistic  
88 opportunity to manipulate the gut microbiome to improve fish condition, increase resilience  
89 to disease and mitigate stress under aquaculture conditions.

90  
91 Ecological theory has been used to describe the mechanisms that shape community  
92 assembly, and more typically applied to macroecology (e.g. fish species assembly<sup>25</sup>,

93 specific populations<sup>26</sup>), but is increasingly being used in microbial ecology<sup>27–29</sup> to  
94 determine underlying rules driving the assembly and dynamics of complex microbial  
95 communities which is particularly challenging<sup>30</sup>. The gut microbiome is a complex and  
96 dynamic ecosystem subject to fluctuating abiotic and biotic conditions. Authors have noted  
97 that founder (priority) effects can play a key role in the community assembly and  
98 succession, i.e., the species that first colonise will alter the environment and determine the  
99 resulting community structure<sup>31,32</sup>. The colonisation of that first species may be random  
100 like a lottery<sup>31</sup>, or determined via resource availability and species traits<sup>33,34</sup>. Assembly  
101 processes are broadly described as either random (stochastic) or non-random  
102 (deterministic)<sup>30</sup>. Researchers have noted that four assembly processes can occur in  
103 microbial communities: neutral and stochastic processes (e.g. probabilistic events such as  
104 births, deaths, mutations and ecological drift<sup>35</sup>) or non-probable events driven from niche  
105 or deterministic forces (e.g., environmental conditions, species interactions and traits).  
106 Neutral theory differs from niche-based theory in the assumption that all species are equal  
107 in terms of functional traits, demographic rates and the environment does not select.

108

109 To determine the underlying mechanisms of microbial community assembly a range of  
110 tools have been described. Many of these rely on ‘null models’. A null modelling approach  
111 considers randomising original community structure and then through a statistical  
112 framework compares properties of microbiome between the original and randomised  
113 communities to elucidate a particular ecological phenomenon. The randomised community  
114 is generated in such a way that it mimics a community without the force of a specified  
115 assembly process<sup>36</sup>. Deviations from the null model can then be used to predict the  
116 processes occurring in the real community. In our previous work, over a twelve-week  
117 period, we fed Atlantic cod juveniles (*G. morhua*) a diet of 10% macroalgal supplement  
118 (either *Ascophyllum nodosum* [ASCO] or *Ulva rigida* [ULVA] species) or a control non-  
119 amended diet<sup>23</sup>. We showed that temporal pressures outweighed the response to diet  
120 supplementation, with the gut microbiome of all fish consuming the different diets  
121 converging. A subset of fish found one diet unpalatable and showed reduced growth  
122 (ASCO\_LG) and did not follow the same trend. The ecological drivers of this convergence  
123 of the microbiome with time was not understood therefore, in the present study, the aims  
124 are to implement a suite of ‘null-modelling’ tools to understand the microbial ecological  
125 assembly mechanisms in the gut of Atlantic cod (*G. morhua*) in an experimental feeding

126 trial over a twelve-week period. Specifically, we aim to determine: i) whether the microbial  
127 community was driven by stochastic, deterministic forces, niche, or neutral effects, ii) the  
128 influence of specific ecological processes on microbial diversity, iii) colonisation and  
129 community succession mechanisms and finally, iv) the resilience of the gut microbial  
130 function to taxonomic perturbation. We hypothesised that the gut microbiome would  
131 demonstrate deterministic and niche-based assembly linked to host development, that this  
132 would outweigh environmental variables such as feed type, and that individuals with  
133 poorer growth (ASCO\_LG) would demonstrate vulnerabilities to taxonomic perturbation.  
134 This work has significant importance with respect to fish gut microbiome research. More  
135 broadly, this work is relevant to areas whereby manipulating the microbial community  
136 through the application of novel feed additives and functional supplements is desired.

137

## 138 **2. Results**

139 It was evident that there were strong temporal pressures on the hindgut microbial  
140 community of juvenile Atlantic cod (*G. morhua*), with a change in the microbial community  
141 composition over the course of the 12-week trial. The OTUs that best correlated with the  
142 temporal community dissimilarities (Bray-Curtis dissimilarity matrix) were *Proteobacteria*,  
143 *Bacteroidetes* and *Firmicutes* species. *Proteobacteria* spp. (OTU\_3130 + OTU\_307 -  
144 *Photobacterium* spp. and OTU\_2746 - *Vibrio* sp.) were associated with Week 0 to Week 8  
145 (Figure 1A). While *Bacteroidetes* spp. (OTU\_9 + OTU\_3586 - *Bacteroides* spp. and  
146 OTU\_41 + OTU\_37 - *Rikenella* spp.) and *Firmicutes* spp. (OTU\_1855 + OTU\_174 +  
147 OTU\_33 - *Ruminococcaceae* spp., OTU\_2624 - *Lachnoclostridium* sp. and OTU\_23 -  
148 *Tyzzarella* sp.) correlated with Week 12 samples (Figure 1). The OTU subset that most  
149 explained the dissimilarity pattern included all the aforementioned OTUs with the exception  
150 of OTU\_37 – *Rikenella* sp. ( $R = 0.902$ ). Notably, a temporal shift in OTUs was not  
151 observed in the ASCO\_LG individuals. Predictive functional analysis using PICRUSt2  
152 revealed that some of the detected microbial metabolism pathways had significantly  
153 changed (greater than Log2 fold) from Week 0 to Week 12 (Supplementary Figure 1). This  
154 included the detection of pathways related to lysine biosynthesis and degradation and  
155 methane metabolism at Week 12, which were not present at Week 0.

156

157

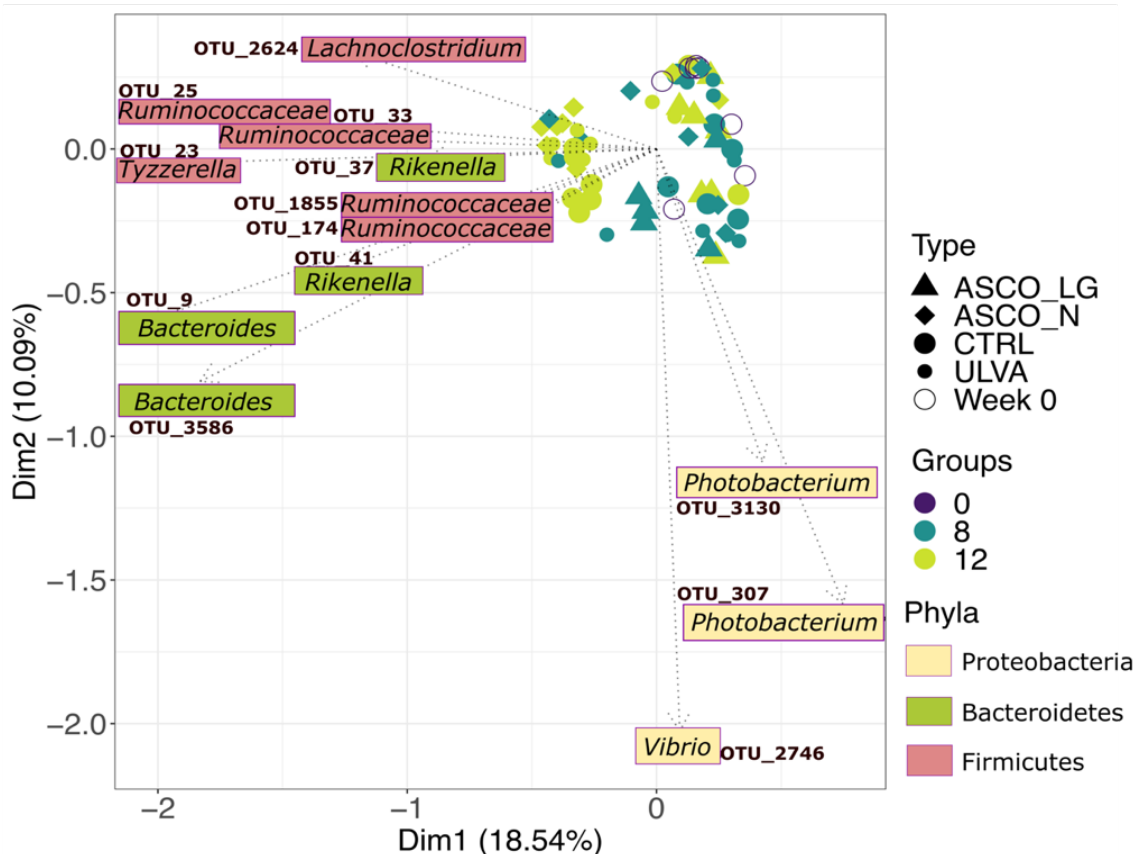

158

159 **Figure 1.** Principal coordinate analysis (PCoA) using Bray-Curtis dissimilarity of the gut  
 160 microbiota of juvenile Atlantic cod (*Gadus morhua*) community composition based on Time  
 161 in weeks (*Groups*: 0, 8, 12) and the dietary treatments (Week 0, CTRL, ULVA, ASCO\_N  
 162 and ASCO\_LG). The ordination is constrained by super-imposing the subset of OTUs  
 163 which roughly explained the same beta-diversity between samples as the full dataset of  
 164 OTUs. Deviance in ordination space is explained by 24.5%. Variation accounted for by  
 165 *Type*;  $R^2 = 0.098$ , \*\*\*  $P = 0.001$ . Variation accounted for by *Groups*;  $R^2 = 0.08644$ , \*\*\*  $P =$   
 166 0.001.

167

168 *2.1. Characterisation of the microbial community assembly mechanisms in the hindgut of*  
 169 *juvenile Atlantic cod (Gadus morhua)*

170 Dissimilarity was observed between Week 0 and Week 8 treatments (CTRL, ULVA,  
 171 ASCO\_N and ASCO\_LG) in pair-wise comparisons with  $q_d$  values  $> 0.65$  (Figure 2Ai).  
 172 This trend in temporal dissimilarity was also observed between the Week 8 and Week 12  
 173 groups (CTRL, ULVA, ASCO\_N, and ASCO\_LG). However, the ASCO\_N and ASCO\_LG  
 174 groups showed less dissimilarity over time with  $q_d$  values  $< 0.5$  between Week 8 and  
 175 Week 12, as compared to the other temporal comparisons. For all groups at  $q$  values close  
 176 to 0 (ignoring relative abundances), dissimilarity was close to the null expectation  
 177 (explained by random assembly). As  $q$  values increased (reflecting the complexity of OTU  
 178 abundance) dissimilarity was further from the null expectation (explained by deterministic

179 forces). The hindgut microbial community showed a trend towards increasing neutrality  
 180 (Figure 2B). Week 12 treatment groups were significantly more neutral than Week 0  
 181 ( $P < 0.05$ ). However, ASCO\_LG samples showed an increase towards niche assembly  
 182 processes over time, though values remained lower than Week 0.

183  
 184 At Week 0, dispersal limitation (limited dispersal or historical contingency), variable  
 185 selection (diverging communities), and homogenising selection (converging communities)  
 186 accounted for 39, 18, and 7%, respectively, of the assembly processes (Figure 2C).  
 187 Undominated assembly (i.e., no ecological process dominated) accounted for 36% at  
 188 Week 0. In the control group [CTRL], variable selection increased to 60% at Week 8. At  
 189 Week 12, variable selection and undominated both equated to 50% contribution to  
 190 community assembly in the CTRL treatments. In contrast, the macroalgal diet treatments  
 191 showed reduced variable selection (4-14%) at Week 12 and increased contribution of  
 192 dispersal limitation assembly process (25-48%). This was particularly apparent in the  
 193 ASCO\_LG fish where dispersal limitation accounted for 70% of community assembly at  
 194 Week 8 and 48% at Week 12. Speciation and homogenising selection were not observed  
 195 as important assembly processes in the cod hindgut microbiome.

196

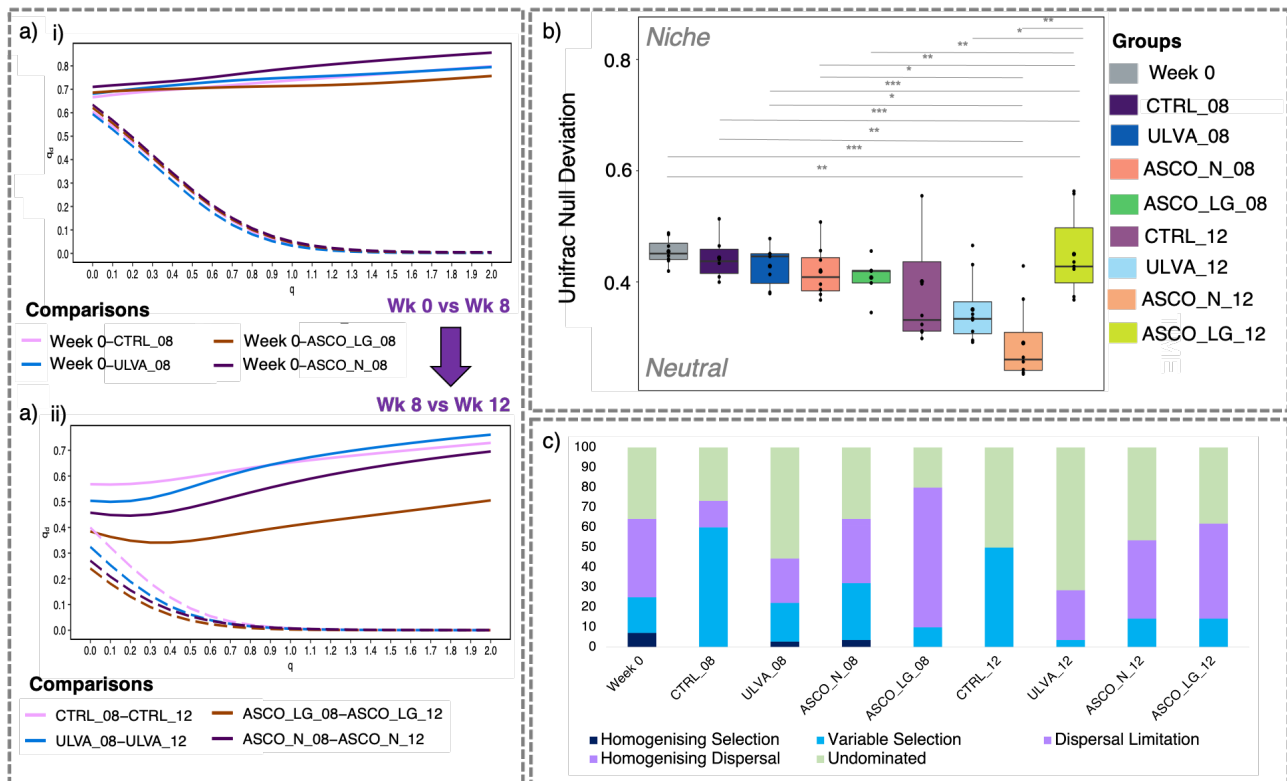

197  
 198 **Figure 2.** Collated figures exploring the influence of stochastic, deterministic, niche and  
 199 neutral ecological assembly and quantitative measures of specific ecological processes  
 200 occurring in the hindgut microbial community of juvenile Atlantic cod (*Gadus morhua*). **a)**

201 *Observed* Hill-based dissimilarity - $q_d$  (solid lines) and the null expectation (dashed line)  
202 based on 999 randomisations for treatment groups' pair-wise comparisons; **(i)** Week 0  
203 versus Week 8 treatment groups (CTRL, ULVA, ASCO\_N and ASCO\_LG); **(ii)** Week 8  
204 versus Week 12 treatment groups (CTRL, ULVA, ASCO\_N and ASCO\_LG. The x-axis can  
205 be interpreted as follows  $q = 0$ ; presence/absence i.e. Jaccard index,  $q = 1$ ; OTUs  
206 abundances are weighted i.e., Bray-Curtis and  $q = >1$ ; OTUs with greater relative  
207 abundance have increased weighting; **b)** The relative changes in niche and neutral  
208 processes assessed using deviations from phylogeny abundance-weighted – Generalised  
209 Unifrac beta null model for treatment groups (CTRL, ULVA, ASCO\_N and ASCO\_LG) over  
210 time (Week 8 and Week 12) and including the base-line time-point Week 0. Lines  
211 connecting categories shows were significant (ANOVA) with \* ( $p < 0.05$ ), \*\* ( $p < 0.01$ ), or  
212 \*\*\* ( $p < 0.001$ ). **c)** Stacked bar-chart showing the percentage contribution of homogenising  
213 selection, variable selection, dispersal limitation, homogenising dispersal and undominated  
214 microbial community assembly processes for Week 0 and the treatment groups (CTRL,  
215 ULVA, ASCO\_N and ASCO\_LG) over time (Week 8 and Week 12). Note that the y-axes  
216 values in each plot in the collated figure differ.  
217

218 *2.2. Examination of priority effects (competitive lottery model) and species succession*  
219 *(phylogenetic recruitment) in the hindgut of juvenile Atlantic cod (Gadus morhua) over time*  
220

221 All clades (groups of taxa) indicated in Figure 2A had OTUs which were “lottery winners”  
222 (> 90% abundance of that clade). According to the threshold Verster and Borenstein  
223 (2018)<sup>31</sup> four clades displayed strong “lottery-like” assembly behaviour (winner prevalence  
224 > 0.75 and winner diversity > 0.25) indicating winners observed in nearly all samples.  
225 These clades were *Alistipes*, *Cetobacterium*, *Fusobacterium*, and *Tyzzarella* genera  
226 (Figure 3A; Supplementary Table S1). This behaviour changed over time with both winner  
227 prevalence and winner diversity decreasing over time. For example, the *Alistipes* clade  
228 with high prevalence (>0.75) at Week 0 and diversity (>0.5), decreased from three OTUs  
229 (OTU\_34, OTU\_20 and OTU\_3429) to a sole OTU at Week 8 (OTU\_3429) and new sole  
230 OTU at Week 12 (OTU\_62). The *Bacteroides* clade showed near lottery-like status at  
231 Week 0 with a high prevalence (>0.75) and diversity of 0.2 at Week 0, winner diversity  
232 decreased from two OTUs (OTU\_9 and OTU\_2969) to one OTU at Week 12 (OTU\_9). In  
233 contrast, *Rikenella* and *Lachnoclostridium* clades (with >50 prevalence) showed low  
234 diversity initially with a single OTU winning (i.e., OTU\_41 *Rikenella* sp. and OTU\_2624  
235 *Lachnoclostridium* sp.). Diversity of winning OTUs increased over time with the addition of  
236 an OTU per clade (i.e., OTU\_37 *Rikenella* sp. and OTU\_130 *Lachnoclostridium* sp.) at  
237 Week 12. Many of the remaining clades showed low diversity with a single OTU indicated  
238 as a ‘winner’. Notably, no *Proteobacteria* genera (which includes *Photobacterium*)  
239 conformed to the competitive lottery schema (data not shown).



240 The hindgut microbial communities from the CTRL and ULVA dietary fish groups were  
 241 primarily neutral with respect to phylogenetic dispersion ( $D=0$ ; Figure 3B), although, there  
 242 was a high variation in the CTRL D values (ranging from -0.45-0.45). In contrast, the  
 243 ASCO\_N fish demonstrated phylogenetic overdispersion ( $D>0$ ;  $D\sim 0.45$ ), while the  
 244 ASCO\_LG group were phylogenetically under dispersed ( $D<0$ ;  $D\sim -0.45$ ). There was a  
 245 significant difference between all treatment groups.

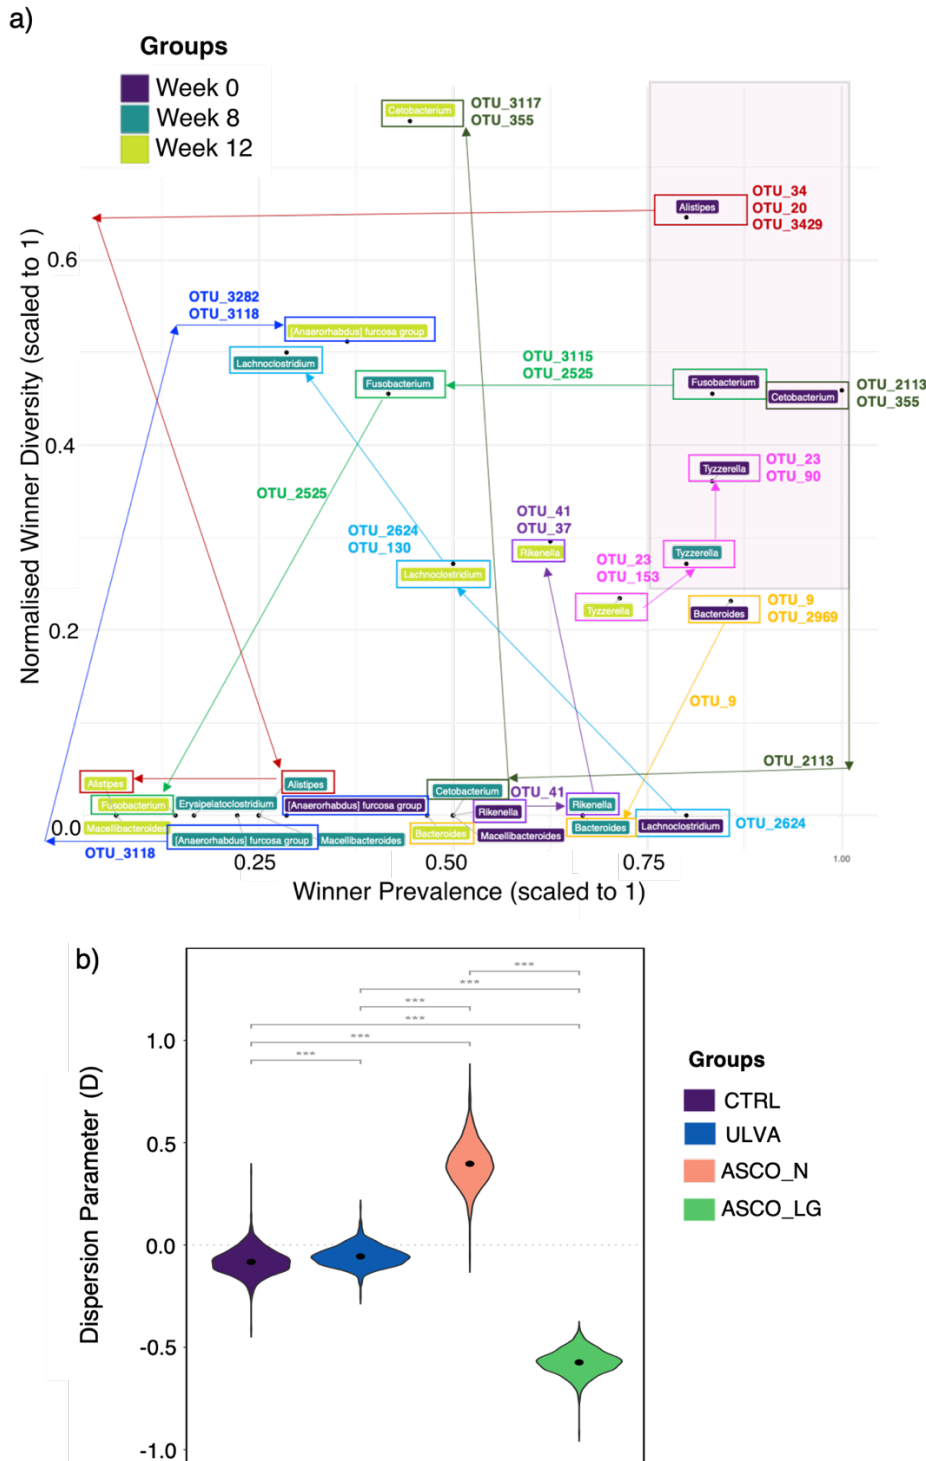

246  
 247 **Figure 3.** Examination of species colonisation (Competitive lottery model) and species  
 248 succession (Phylogenetic recruitment model). **a)** Competitive lottery model highlighting the

249 genera with operational taxonomic units (OTUs) showing lottery-like behaviour in Week 0,  
250 Week 8, and Week 12 groups. Winner prevalence (percentage abundance of lottery  
251 winners across samples) is plotted on the x-axis and winner diversity (count of winning  
252 OTUs within a genus across samples) on the y-axis. In the case of high winner diversity,  
253 multiple OTUs can show up as winners within a genus, when winner diversity is low a  
254 single OTU is highlighted as a winner in the genus. The arrows show the temporal  
255 changes in diversity/prevalence of a specific genus. Table of winning OTUs is included in  
256 Supplementary File 1. **b)** Phylogenetic recruitment of species over time (Week 8 and  
257 Week 12) in the CTRL, ULVA, ASCO\_N and ASCO\_LG groups. Each violin plot shows the  
258 distribution of Dispersion estimates (D) given by logistic error model bootstraps.

### 259 260 *2.3. Stability of Hindgut Microbiome to Taxonomic Perturbation*

261 In general, attenuation values increased over time from 2.2 at Week 0 to 2.7 at Week 12  
262 (*high values indicate robustness due to functional overlap*). However, these were not  
263 found to be statistically significant, and were highest in the ASCO treatments at Week 12  
264 (Figure 4A). Buffering values were in the range of 1.9-2.05 and no temporal or treatment  
265 effects were noted (Figure 4B) – *high values indicate functions are balanced across the*  
266 *communities*. We then implemented a principal coordinate analysis (PCOA) using five  
267 gene distribution features (GDF). The analysis showed that at Week 0 the microbial  
268 community was clustered towards increased unique function abundance and higher  
269 average functional redundancy (Figure 4C). The ASCO\_LG (Week 8 and Week 12)  
270 samples clustered towards increased average genome size, genome size variability, and  
271 average functional dissimilarity.

272

273

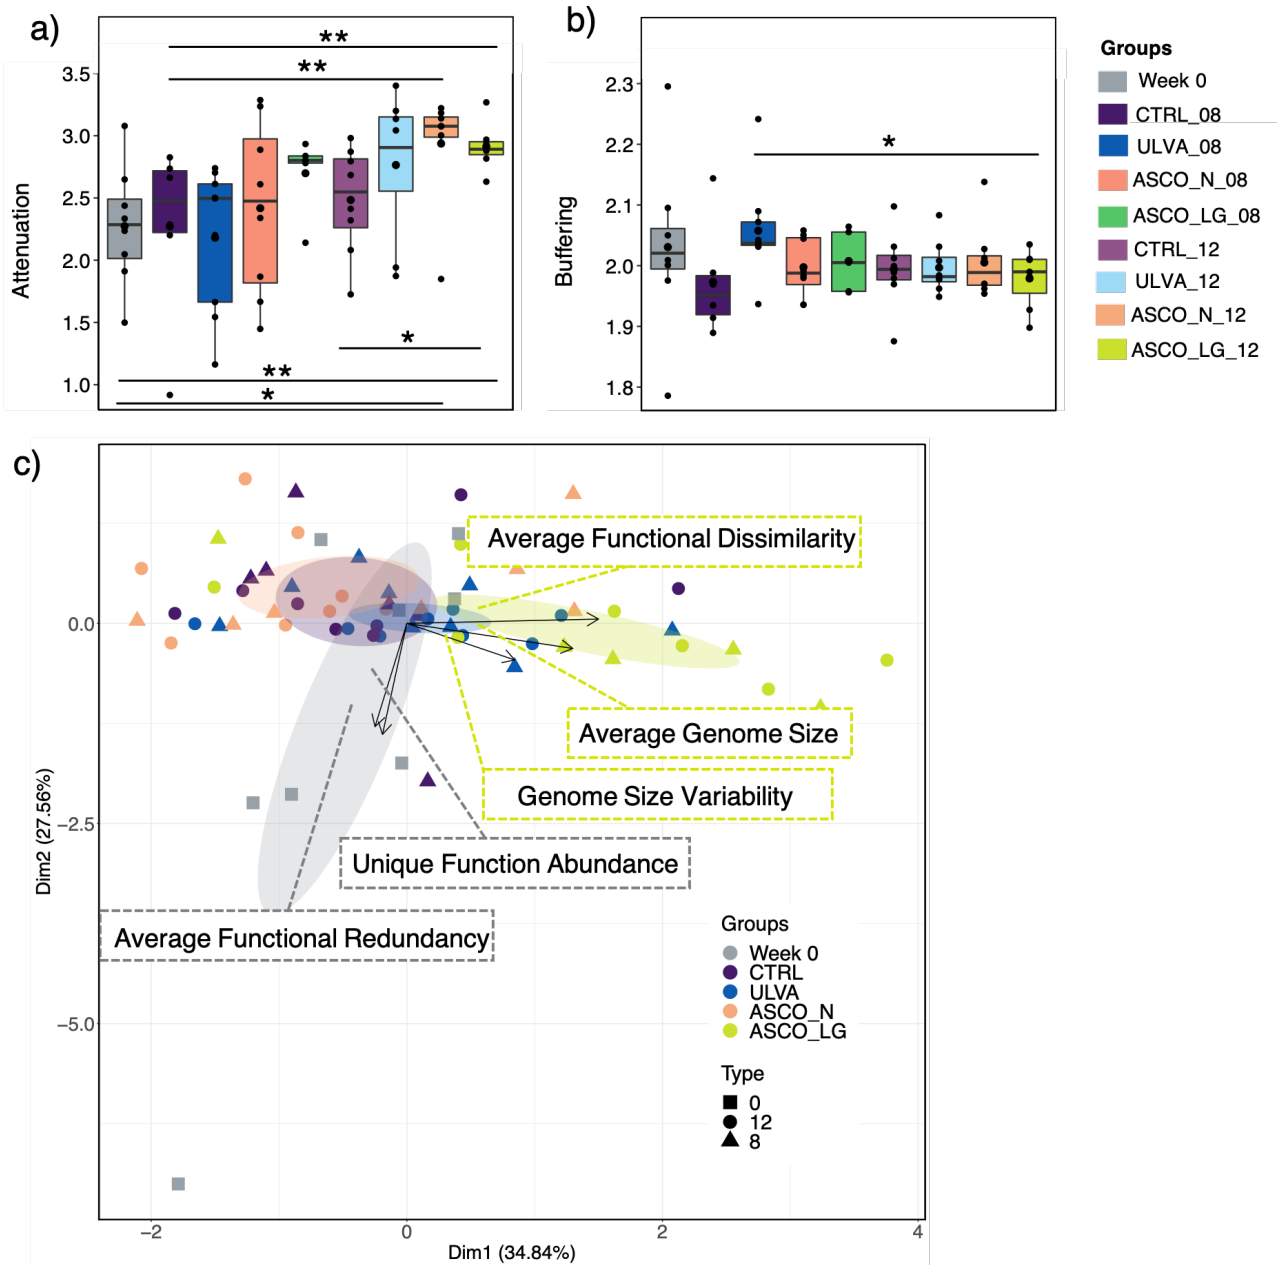

274

275 **Figure 4.** Taxa-function robustness in the Atlantic cod hindgut microbiome compared  
 276 across Treatments and Time (Groups: Week 0, CTRL\_08, CTRL\_12, ULVA\_08,  
 277 ULVA\_12, ASCO\_N\_08, ASCO\_N\_12, ASCO\_LG\_08 and ASCO\_LG\_12). **a)** The  
 278 attenuation values for each group. **b)** The buffering values for each group. **c)** Principal co-  
 279 ordinate analysis plot of the five gene distribution factors compared across group (Week 0,  
 280 CTRL, ULVA, ASCO\_N and ASCO\_LG) over time (Week 0, Week 8 and Week 12). Lines  
 281 connecting categories shows were significant (ANOVA) with \* (p < 0.05), \*\* (p < 0.01), or  
 282 \*\*\* (p < 0.001).

283

284

285 In general, the attenuation values of specific functions were significantly increased from  
 286 Week 0 to Week 12 (Figure 5A). In the Supplementary Figure 2, we show the comparisons  
 287 of the dietary treatments over time with the exclusion of the ASCO group samples. The  
 288 attenuation values of carbohydrate metabolism increased from ~1.0 at Week 0 to 2.2 at

289 Week 12 when comparing the over time without the inclusion of any ASCO samples  
290 (Supplementary Figure 2). Notably, when making comparisons across all dietary  
291 treatments, the attenuation values for functional superpathways related to infectious  
292 diseases, cell growth and death, replication and repair increased over time, in all but the  
293 ASCO\_LG samples (Figure 5A). The dietary subgroup ASCO\_LG had increased values  
294 for functional superpathways related to the excretory system, translation, transport, and  
295 catabolism (Figure 5A). The buffering values for superpathway functions related to  
296 metabolism (metabolism of cofactors and vitamins, biosynthesis of other secondary  
297 metabolites) decreased over time and across all treatment groups, except ASCO\_LG  
298 (Figure 5B). A similar trend was also observed in the specific buffering functions related to  
299 cell regulation processes (folding, sorting and degradation, replication and repair and  
300 signal transduction).

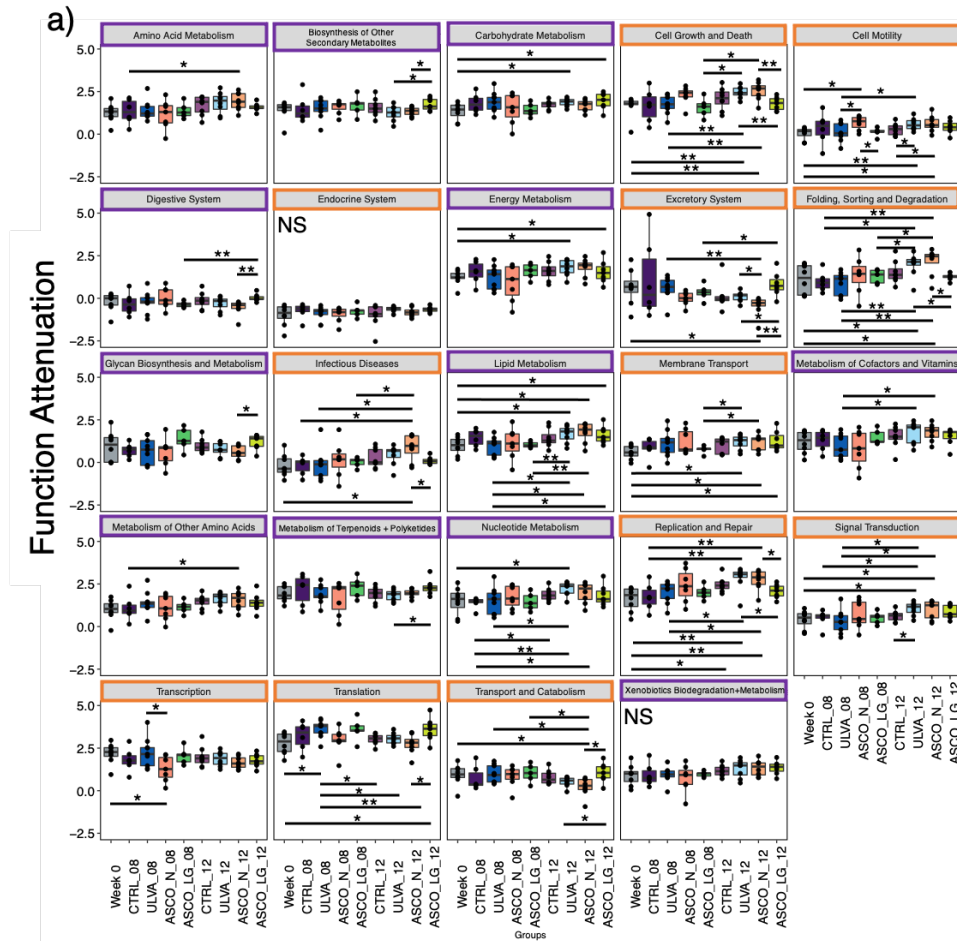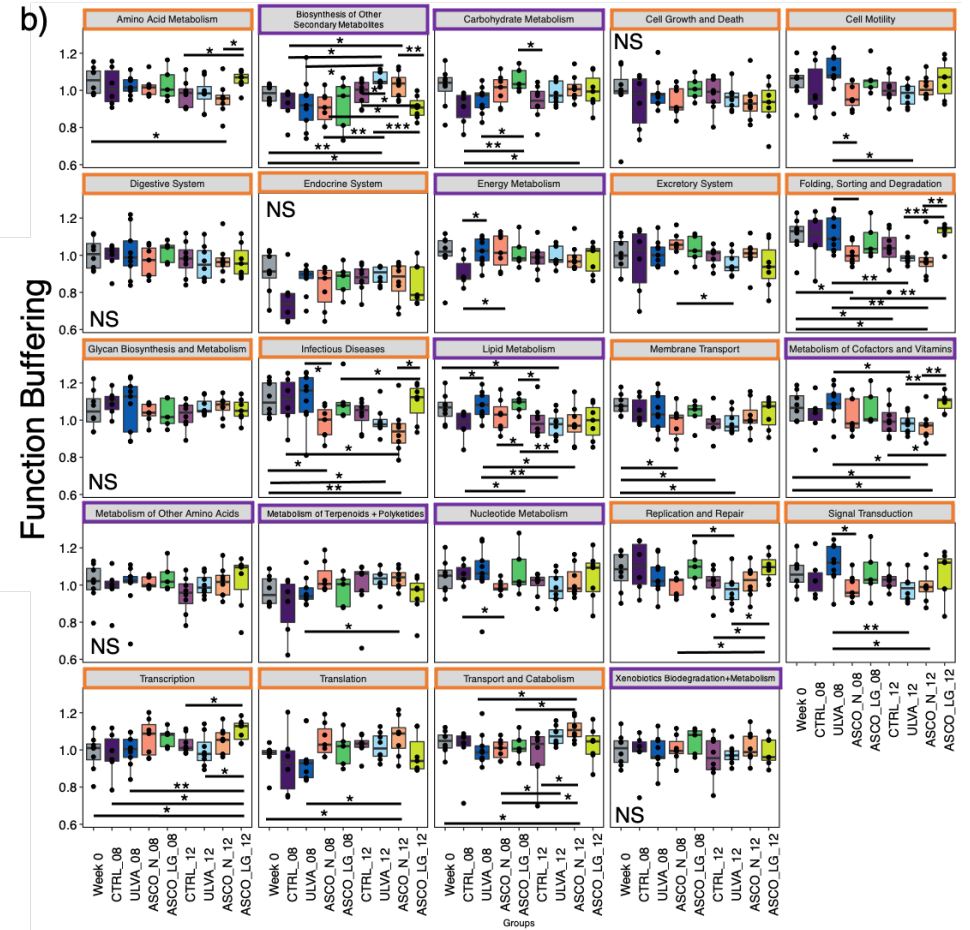

**Figure 5.** Taxa-function robustness in the Atlantic cod hindgut microbiome compared across treatments and time (Groups: Week 0, CTRL\_08, CTRL\_12, ULVA\_08, ULVA\_12, ASCO\_N\_08, ASCO\_N\_12, ASCO\_LG\_08 and ASCO\_LG\_12) for specific microbial superpathway functions. Functions are highlighted as being involved in metabolism (purple box) or cell functioning (orange box). **a)** The specific-robustness attenuation functions that were statistically significant between groups. **b)** The specific-robustness buffering functions that were statistically significant between groups. Lines connecting categories shows were significant (ANOVA) with \* ( $p < 0.05$ ), \*\* ( $p < 0.01$ ), or \*\*\* ( $p < 0.001$ ) or NS (not significant).

### 3. Discussion

The fish gut microbiome is essential to systemic function, fish health<sup>37</sup>, immune support<sup>38</sup> and digestive capacity<sup>39</sup>. However, the factors that govern the microbial community colonisation, assembly, and succession in fish species are poorly understood, in terms of both the ecological assembly mechanisms and development within the life cycle. Indeed, in our previous work<sup>23</sup>, we noted a shift in the hindgut microbial community dynamics of juvenile Atlantic cod over time. This displacement was summarised in the current manuscript as a shift from Proteobacteria (mostly *Photobacterium* spp.) to Bacteroidetes and Firmicutes species. Interestingly, this pattern was not observed in fish that found one of the experimental diets unpalatable (ASCO\_LG). In this study, we endeavoured to determine the ecological processes that may shed light on this temporal convergence in the hindgut microbiome. We implemented a suite of ‘null-modelling’ approaches to determine the influence of stochastic, deterministic, niche, neutral forces, quantify the contribution of specific ecological processes (selection or dispersal), colonisation, and succession processes. Using the taxa-function robustness measure we determined the potential stability of the gut microbiome to taxonomic perturbation. Understanding such mechanisms is an important step towards managing fish gut microbiome response to newly introduced aquafeed ingredients and improving welfare.

The juvenile cod gut microbiome was driven by deterministic forces. Deterministic forces are those which are shaped by environmental conditions (e.g., pH, nutrient availability), species interactions (e.g., competition and mutualism), or species traits (species genetics). Interestingly, analysis according to Jaccard index (presence/absence) data indicated stochastic processes were driving the microbial community diversity. Thus, we highlight the utility of using the approach by Modin et al. (2020)<sup>40</sup> to determine the beta-diversity equivalent of hill numbers ( $q_d$ ) by considering the weighting of OTUs in the community. Contrary to our hypothesis, we observed that there was a temporal trend from niche to neutral processes. Neutral processes indicate a lack of environmental selection. This is consistent with Hayes et al. (2020)<sup>41</sup>, where the authors showed neutral processes dominated the gut microbiome in farmed Atlantic salmon (*Salmo salar*). In contrast, however, other authors have found a decreasing influence of neutral processes over time in zebrafish (*Danio rerio*) gut microbial communities<sup>42,43</sup>. However, environmental conditions (e.g. temperature and salinity) are additional variables in these comparisons.

That we found multiple assembly processes contributing to overall assembly is unsurprising, since multiple processes can be occurring in a system given the complexity of the biology and interactions with the environment<sup>44</sup>. Moreover, the host environment itself places a deterministic pressure on the microbial communities, given that primarily only species capable of surviving in the gut ecosystem will proliferate in this environment over time<sup>45,46</sup>.

Our results supported evidence of temporal pressure influencing the developing gut microbiome in juvenile cod. In our study, dispersal limitation, variable selection and undominated (weak selection and moderate dispersal) were the primary ecological processes occurring in the cod gut microbiome. The dominant process found varied with respect to time and treatment. For example, variable selection increased at Week 8 for all groups and was the prevailing process at Week 12 in the control group. Variable selection indicates strong selective pressures driving divergent shifts in species composition. However, variable selection was not a dominant process in the macroalgae treatments at Week 12. Yet, the communities in the CTRL, ULVA, and ASCO\_N converged in terms of taxonomic composition over the course of the trial. This may point to host-associated factors, however, it is difficult to say with certainty in our study design if patterns are due to host-associated pressures. Host development was found to be a significant influence on driving deterministic microbial community assembly in the zebrafish gut<sup>42</sup>. However, host pressures in the juvenile or adult cod gut are not widely described, a study design similar to the zebrafish study but with Atlantic cod could help elucidate these factors. Research on the Atlantic cod larval phase has suggested that selective pressures in the gut, associated with host intestinal development combined with stochastic pressures, shaped the gut microbiota<sup>47,48</sup>. Ecological theory has been loosely applied to manipulate the microbiome of Atlantic cod larvae by changing the tank water to improve survival rates using selection<sup>49</sup>. How the cod gut microbiota changes through developmental stages is unclear as studies including ours, have focused on a single life stage.

While in the macroalgal dietary treatments dispersal limitation was a core process in the hindgut, this effect was increased in the ASCO\_LG fish that found the diet unpalatable. We have not directly cross-compared treatment groups, as each sample represents an individual fish, treatment groups were in separate tanks, and we had sacrificial temporal

sampling thus direct dispersal would have been limited between these communities. As defined by Stegen et al. (2015)<sup>50</sup>, dispersal limitation indicates that a low dispersal rate is the primary cause of high compositional turnover (aiding ecological drift or stochastic processes), although the framework does not account for *in situ* diversification. This would occur where dispersal rates are low and new OTUs that evolve within a single taxon may only be present in one community. Given the gut structure whereby the digesta content is contained within the digestive tract (i.e., a semi-closed system), diversification could be an uncharacterised influence here.

The digestive system is a space-limited system, stochastic models such as the competitive lottery model can shed light on what species will be first to occupy the niche space and thus, manipulate the conditions for subsequent species. Interestingly, clades that showed strong lottery-like behaviour (*Alistipes*, *Cetobacterium*, *Tyzzarella*, and *Fusobacterium*), primarily only did so at Week 0. This indicated that there was a temporal effect and/or that the physical change from a commercial diet to in-house pellets may have impacted microbial competition for space in the hindgut. To fully elucidate this more earlier time points including the former diet would be required (Experiment started Day 366 post hatch baseline prior to changing feed – Week 0). *Photobacterium* species decreased in relative abundance over the course of the feed trial. *Photobacterium* species have a high prevalence in many fish species, including wild cod populations<sup>21,22</sup>. Notably, *Photobacterium* was completely absent of lottery winners (i.e., no OTUs were > 90% within this clade in our samples). Species that do not conform to the competitive lottery schema are thought to be less specialised in their niche and co-exist with other species<sup>31</sup>, which would support the widespread distribution of *Photobacterium* across fish species<sup>19</sup>. Authors have noted that the gut microbiome in Atlantic cod had limited diversity and consisted primarily of *Photobacterium* and other closely related species (showed nepotism)<sup>51</sup>. On this point, the phylogenetic recruitment model showed that the hindgut communities in CTRL and ULVA were neutral while the ASCO\_N and ASCO\_LG showed overdispersion and under dispersion (more nepotism), respectively. One disadvantage of this study is that we do not have samples for the source metacommunity (tank seawater). In most of the tested community assembly methods, the ASCO\_LG fish did not follow the same trend as the other dietary treatments, thus indicating that microbial community assembly patterns were disrupted in fish that displayed poorer growth rates and found the



diet unpalatable. These microbial community assembly patterns may drive unexpected changes in fish condition and function<sup>52</sup>. This indicates that diet selection could play a role in the disruption of the microbiome development in farmed fish<sup>53</sup>. Resolving these issues may offer an opportunity to use the gut microbiome to develop fish with improved condition and immune competence for commercial use as in aquaculture or in wild population restocking programmes.

The gut microbiome of any species is integral to the functioning of the system, microbial imbalance can lead to harmful impacts to the host in a condition called dysbiosis<sup>54</sup>. This occurs when the microbial community changes result in a change in function, leading to altered pathways, and the production of excess acids for example. However, the microbial taxonomic composition of a system can fluctuate without detectable changes to the inherent functioning, i.e., functional redundancy, whereby multiple taxa can carry out the same function. We observed taxonomic shifts in the hindgut microbial community over time, and changes in the predicted functional pathways. This may have been related to community imbalance or a natural succession of the communities. In gut microbial communities, the relationship between species taxonomic and functional profiles has been defined as the 'taxa-function relationship'. This relationship can be viewed as a landscape containing the breadth of microbial taxa and inter-related functional capacities. Using such a landscape, the situations resulting in dysbiosis (microbial imbalance which is harmful to the host) can be assessed. We used the *taxa-function robustness* measure<sup>55</sup> to calculate the breadth of taxonomic shifts (perturbations) and the community functional capacity. In our work, we showed that in the hindgut microbiome, despite temporal taxonomic shifts, the microbial communities increased in robustness and functional stability, particularly for functions involved in metabolism and cell regulation over time. The community exhibited greater functional redundancy over time, indicating an overlap of functional ability. In general, the ASCO\_LG individuals followed a different trend. These findings could be improved with the addition of metagenomic data to provide a less predictive approach. This work highlights that functional analysis of microbial communities in complex systems, such as the gut has a greater utility than taxonomic profiles<sup>56</sup>.

In summary, the ecological drivers of microbial community assembly in the gut microbiome are important factors to consider when linking microbial community composition and

diversity to fish health and environmental parameters. We conclude that the microbiome in the gut of Atlantic cod (*G. morhua*) in an experimental feeding trial over a twelve-week period was under the influence of multiple assembly processes (deterministic assembly and a trend from niche to neutral processes). We quantified these processes as an increase in variable selection in the control diet (divergence in communities related to selective environmental conditions) over time. Dispersal limitation was a driver of the gut microbiome for fish fed the macroalgae supplemented diet at Week 12. Clades that conformed to the competitive lottery schema and had 'winning' OTUs (*Alistipes*, *Cetobacterium*, *Tyzzarella*, and *Fusobacterium*) only showed status behaviour at Week 0. *Photobacterium*, an important taxon in fish gut research did not show lottery-like behaviour. The recruitment of new taxa overtime was altered in the ASCO (10% *Ascophyllum nodosum* supplement), with individuals who found the diet unpalatable exhibiting phylogenetic under dispersion (nepotistic recruitment of species). Finally, the gut microbiome showed increasing robustness to taxonomic disturbance over time and an increase in functional redundancy, except for the ASCO\_LG individuals. These fish showed an altered microbiome, with increased susceptibility to functions related to infectious diseases and cell regulation. Finally, although our study focused on the juvenile cod gut microbiome, many of these findings are of broad interest in fish research, and indeed to the wider field of gut microbiome research. Further research is needed to unravel the complex interactions between host and microbiome to determine how it influences strong selection on the gut microbiome. Targeted 'omic sequencing and metabolomics of the digesta content to track the gut microbiome and function over the complete life cycle of Atlantic cod (*G. morhua*) may elucidate these factors. Such models that may emerge could be applied to other important marine fish species for better health management in terms of prebiotics and probiotics as functional feed additives.

#### **4. Materials and Methods**

A full description of the experimental design, fish feed formulation, fish condition, sample collection and sequencing analysis is included in our previous work<sup>23</sup>. Briefly, juvenile Atlantic cod (*G. morhua*) were hand-graded ( $123 \pm 7$  g, SD) and randomly allocated to one of nine experimental tanks (60 individuals per tank). Fish were acclimated for one week on a commercial fishmeal diet (Amber Neptun, Skretting, Stavanger, Norway), noted as the Week 0 sampling phase. Then tanks were assigned to the following diets, a 10% dietary

macroalgae supplement (either *Ulva rigida* [ULVA] or *Ascophyllum nodosum* [ASCO] species) or a control diet for basal comparison, i.e., no algal addition [CTRL]. At Week 8 within the feed trial, a subgroup of the ASCO fish displaying 'reduced growth rates' were observed and was likely due to reduced acceptance of the feed<sup>23</sup>. We therefore subcategorised this group as [ASCO\_LG], and the remaining fish with 'normal' growth were referred to as [ASCO\_N] (see Keating et al 2021<sup>23</sup> for further discussion). The feed trial was carried out for twelve weeks.

#### *4.1 Sample Collection, DNA extraction and 16S rRNA amplicon sequencing*

At each noted time-point: Week 0, Week 8, and Week 12, individual fish were removed from the tanks and euthanised with an overdose of tricaine methanesulphonate solution (MS222, Pharmaq, Overhalla, Norway). The brain was then destroyed to confirm death according to regulations for animal welfare (EU Directive 2010/63/EU). The digestive tract of the fish was aseptically removed and the digesta content from the last 10-15% of the digestive tract was aliquoted into sterile microcentrifuge tubes. Samples were transported to the National University of Ireland Galway on dry ice and stored at -80°C. DNA extractions from hindgut digesta per sample were carried out using a modified phenol-chloroform extraction method that included a bead-beating step using Lysing Matrix E tubes (MP Biomedical, Illkirch-Graffenstaden, France), as described previously<sup>23,57</sup>. Sample DNA and DNA from a negative extraction control (nuclease-free water, Qiagen, Venlo, The Netherlands) were sent to the Research Technology Support Facility at Michigan State University (Michigan, USA) for sequencing. Amplicon sequencing of the 16S rRNA gene targeting the V4 hypervariable region using the universal primer set [515f/806r<sup>58</sup>]. Sequencing was carried out using the Illumina technology using a standard flow cell and 500 cycle v2 reagent cartridge (Illumina Inc., Hayward, California, USA).

#### *4.2 Bioinformatics*

The methods to generate all microbial data (e.g., operational taxonomic units (OTUs), phylogenetic trees and biom. files) are given in Keating et al (2021)<sup>23</sup>. The raw sequences are also available in the SRA database under Bioproject Submission PRJNA636649.

#### *4.3 Subset Analysis*

For finding key microbial species that contribute to beta-diversity between samples over time we used the “BVSTEP” routine<sup>59</sup>. Briefly, the method calculates the Bray-Curtis distance between samples using all the OTUs and records it as original distances. It then permutes through the subset of OTUs, and for each permutation, it calculates the Bray-Curtis distances between the samples again and correlates these distances against the original recorded distances until subsets are obtained that explain roughly the same beta diversity as the full set of OTUs. To run this algorithm, `bvStep()` (from the `sinkr` package) was used<sup>60</sup>. After obtaining the subset of OTUs, we used R’s ‘Vegan’ package<sup>61</sup>, particularly the `bioenv()` function to regress the subsets on top of the principal coordinate analysis (PCOA) plot.

#### 4.4 Microbial Community Assembly

##### 4.4.1. Hill-numbers dissimilarity indices ( ${}^q d$ )

Hill numbers are a set of indices parameterised by  $q$  representing the diversity order which determines the weight given to the relative abundance of OTUs in a community. <sup>40</sup> derived the beta-diversity equivalent of hill numbers ( ${}^q d$ ) as a dissimilarity index of diversity order where  ${}^q d$  values are scaled between 0 (similar) and 1 (dissimilar). The authors used this approach to illustrate how OTU abundance contributes to the dissimilarity between communities. Here, we compared  ${}^q d$  at  $q=0$  (presence/absence, i.e., Jaccard index),  $q = 1$  (OTUs abundances are weighted ie Bray-Curtis) and  $q = >1$  (OTUs with greater relative abundance have increased weighting). Further, a randomisation scheme was applied, and repeated many times to obtain the null distribution for the dissimilarities across this scale between communities. These null distributions when compared to the observed dissimilarity ( ${}^q d$ ) reveal ecological insights, i.e., if the values are similar, the observed dissimilarity can be explained by stochastic factors, and if higher or lower than the null expectation, then there are likely deterministic factors that favour different or similar microbial taxa in two categories. These indices and null distributions were calculated using the `qdiv` Python software<sup>40</sup>.

##### 4.4.2 Beta-Null Model

Beta-null deviation measures were calculated according to Tucker et al (2016) and Lee et al. (2017)<sup>35,62</sup>. The method first calculates the pairwise observed dissimilarities ( $\square_{\text{obs}}$ )

between samples using the Generalised Unifrac dissimilarity measure. By preserving the alpha diversity in the observed samples, random communities are generated (999 randomisations) to calculate the beta diversity measure again for these communities ( $\square_{null}$ ) and then the deviation from the observed dissimilarities are recorded. The average of the deviations gives a numerical value that differentiates between niche (values further from 0) and neutrally structured communities (values nearer to 0). We have done this separately for each treatment group on a temporal basis (Week 0, CTRL\_08, ULVA\_08, ASCO\_N\_08, ASCO\_LG\_08, CTRL\_12, ULVA\_12, ASCO\_N\_12, and ASCO\_LG\_12).

#### 4.4.3 Quantitative Process Elements

Quantitative process elements (QPE) were used to assess the influence of ecological processes based on the conceptual framework of Vellend et al (2010)<sup>63</sup> and implemented according to Stegen et al (2013, 2015)<sup>50,64</sup>. This framework provides a quantitative measure of the influence of selection and dispersal pressures on microbial community structure. Selection considers deterministic selective pressure which results in divergent (variable selection) or convergent (homogenous selection) communities often considered overtime. While dispersal considers the spatial movement of species where the increased movement of species results in convergent communities (homogenising dispersal), or limited movement of species results in divergent communities through drift (dispersal limitation). The authors also included the category 'Undominated' to describe the situation whereby neither selection nor dispersal processes dominate.

The framework considers the phylogenetic distance and phylogenetic turnover between closely related OTUs in pairwise samples<sup>29</sup>. This is achieved using the abundance-weighted  $\beta$ -mean-nearest taxon distance ( $\beta$ MNTD)<sup>65</sup>. To determine how this varied from the null expectation, randomisations were employed whereby the abundances and species names were shuffled across phylogenies to provide a null value<sup>64</sup>. This was replicated 999 times to give the null distribution. The deviation between the null distribution and the observed  $\beta$ MNTD value =  $\beta$ -nearest taxon index ( $\beta$ NTI). If the observed  $\beta$ MNTD value is significantly greater ( $\beta$ NTI > 2) or less ( $\beta$ NTI < -2) than the null expectation, the community is assembled by variable or homogeneous selection, respectively. For the remaining with no significant deviation, in the next step, Raup-Crick was used with the inclusion of OTU relative abundance<sup>66</sup> termed  $RC_{bray}$ .  $RC_{bray}$  values were compared to the null expectation

and the resulting deviation determined the influence of dispersal ( $RC_{\text{bray}} > .95$ ). Values of  $RC_{\text{bray}} > -.95$  indicate *Homogenising Dispersal* (transport between microbiomes leading to establishment), while values of  $RC_{\text{bray}} > +.95$  indicate *Dispersal Limitation*. In the latter, this may indicate ‘true’ effects of dispersal limitation (i.e., limited transport across microbiomes and stochastic events) and/or historical contingency. In cases where values were  $<0.95$  the communities were ‘Undominated’, i.e., not dominated by a sole ecological process.

#### 4.4.4. Competitive Lottery Model

We applied the competitive lottery model as outlined in<sup>31</sup> which is based on the theory of Sale (1977)<sup>67</sup> first proposed for fish populations. The theory is based on the idea that there is competition between colonising species within a niche and only a single species can ‘win’ in the space (strong priority effect). This ‘winner’ is chosen at random (stochastic process) with an analogy drawn to a ‘lottery’. In microbial ecology this scheme determines clade-based assembly, i.e., within a taxonomic group (a genus), we can determine if the group follows lottery-like behaviour and if so what OTUs ‘win’. A winning species/OTU is defined as a clade member with  $>90\%$  abundance [see Verster and Borenstein (2018)<sup>31</sup>] for details on how this threshold was determined. Then the diversity of lottery winners was calculated using Shannon diversity index of the winners across samples (how often each OTU occurs as a winner in samples where lottery-like behaviour was observed). Diversity was normalised between 0 and 1 to account for differences in lottery winners. Values approaching 0 indicate that a single OTU is dominating that specific genus in all samples, while values approaching 1 indicate an even distribution of winning OTUs within a genus.

#### 4.4.5. Phylogenetic Recruitment Model

The phylogenetic recruitment model<sup>68</sup> was then used to describe the order in which new species are detected in the cod hindgut microbiome over time. In this model, the dispersion parameter (D) is calculated based on the probability of detection of new species on temporal scales by fitting a logistic error model on changes in phylogenetic diversity (PD) estimates. As opposed to previous models, time-series dependency is assumed. The value of D determines the community assembly mechanisms with  $D = 0$  indicating the neutral model (all species have an equiprobable chance of detection). The community is said to be over dispersed when  $D > 0$ . In this case, species from the species pool have

higher probabilities of detection when they are more phylogenetically divergent from the species that have already been detected. In contrast, the community is said to be under dispersed when  $D < 0$ . Here, species from the species pool have higher probabilities of detection when they are more phylogenetically similar to species that have already been detected (exhibiting nepotism).

#### 4.5. Functional Analysis and Taxa-Function Robustness

##### 4.5.1 Functional Analysis

The functional potential was obtained as KEGG orthologs (KO) and pathway predictions by using Phylogenetic Investigation of Communities by Reconstruction of Unobserved States (PICRUSt2)<sup>69</sup> and the Quantitative Insights into Microbial Ecology (QIIME2) plugin<sup>70</sup> using the parameters `--p-hsp-method pic --p-max-nsti 2`. To find KEGG enzymes/MetaCyc pathways that are significantly different between different categories, we used `DESeqDataSetFromMatrix()` function from DESeq2<sup>71</sup> package with the adjusted p-value significance cut-off of 0.05 and  $\log_2$  fold change cut-off of 2. This function uses a negative binomial general linear model to obtain maximum likelihood estimates for OTUs log fold change between two conditions. Then Bayesian shrinkage is applied to obtain shrunken log-fold changes subsequently employing the Wald test for obtaining significances. For KEGG orthologs that were at least  $\log_2$  fold significant, we used iPath3<sup>72</sup> to give an overview of KEGG pathways for microbial metabolic function.

##### 4.5.2. Taxa-Function Robustness

Following the procedure of Eng and Borenstein (2018)<sup>55</sup>, the *taxa-function robustness* measure of the cod hindgut microbial communities was calculated. The principle of the taxa-function robustness measure is to perturb an individual sample several times (100 perturbations) and then calculate a two-dimensional profile of taxonomic shift versus functional shift. To create the taxonomic profiles, weighted Unifrac dissimilarities were calculated across samples and simulated perturbations. To obtain predicted functional profiles, the authors calculated the KEGG Orthology (KO) groups for the whole green genes database (gg\_13\_5) along with KO copy numbers provided as a reference database (<https://github.com/borenstein-lab/robustness>), which can be used if the OTUs follow the green genes nomenclature. For the functional profiles, cosine dissimilarities

were calculated across samples and simulated perturbations. After obtaining the taxonomic and functional shifts (both denoted as  $t$ ) for a given sample, a relationship between taxonomic perturbation magnitude and functional profile shift is assumed to behave individually as  $f = \frac{1}{e^a} t^b$  and fitted using the linear regression model on natural log transformed data:  $\ln(f) = -a + b \ln(t)$ . In the equation,  $f$  denotes the expected shift in functional profile and we can estimate **a** (termed as “attenuation” coefficient describing *the expected rate at which increases in the taxonomic perturbation magnitude are expected to increase functional profile shifts*) and **b** (termed as “buffering” coefficient indicating how large a perturbation must be before a functional profile shift becomes noticeable). The coefficients thus serve as proxies (robustness factors) to summarise the property of a sample to withstand perturbation. These were then calculated for all the samples in the dataset. Additionally, the main gene distribution features (GDFs) across the genomes of species in a community, were then displayed as a PCOA plot. Further details can be found in Eng and Borenstein (2018)<sup>55</sup>.

## 5. Data Availability Statement

The raw sequences are also available in the SRA database under Bioproject Submission PRJNA636649.

## 6. References

1. FAO. 2020. *The State of World Fisheries and Aquaculture 2020. Sustainability in action. Rome.* <https://doi.org/10.4060/ca9229en>
2. Nardi, G., Prickett, R., Meeren, T. van der, Boyce, D. & Moir, J. Atlantic cod aquaculture: Boom, bust, and rebirth? *Journal of the World Aquaculture Society* **52**, 672–690 (2021).
3. Kjesbu, O. S., Taranger, G. L. & Trippel, E. A. Gadoid mariculture: development and future challenges. *ICES J Mar Sci* **63**, 187–191 (2006).
4. Vadstein, O., Attramadal, K. J. K., Bakke, I. & Olsen, Y. K-Selection as Microbial Community Management Strategy: A Method for Improved Viability of Larvae in Aquaculture. *Front. Microbiol.* Nov 14;9:2730. (2018).
5. Karlsen, Ø., Norberg, B., Kjesbu, O. S. & Taranger, G. L. Effects of photoperiod and exercise on growth, liver size, and age at puberty in farmed Atlantic cod (*Gadus morhua* L.). *ICES Journal of Marine Science* **63**, 355–364 (2006).



6. Taranger, G., Aardal, L., Hansen, T. & Kjesbu, O. Continuous light delays sexual maturation and increases growth of Atlantic cod (*Gadus morhua* L.) in sea cages. *ICES Journal of Marine Science* **63**, 365–375 (2006).
7. Puvanendran, V., Mortensen, A., Johansen, L.H., Kettunen, A., Hansen, Ø.J., Henriksen, E., and Heide, M. Development of cod farming in Norway: Past and current biological and market status and future prospects and directions. *Reviews in Aquaculture* Jul 22 (2021).
8. Wan, A. H. L., Davies, S. J., Soler-Vila, A., Fitzgerald, R. & Johnson, M. P. Macroalgae as a sustainable aquafeed ingredient. *Reviews in Aquaculture* **11**, 458–492 (2019).
9. Wan, A. H. L. Soler-Vila, A., O’Keeffe, D., Casburn, P., Fitzgerald, R. and Johnson, M.P. The inclusion of *Palmaria palmata* macroalgae in Atlantic salmon (*Salmo salar*) diets: effects on growth, haematology, immunity and liver function. *Journal of Applied Phycology* **28(5)**, pp.3091-3100, (2016).
10. Niu, J., Xie, S.W., Fang, H.H., Xie, J.J., Guo, T.Y., Zhang, Y.M., Liu, Z.L., Liao, S.Y., He, J.Y., Tian, L.X. and Liu, Y.J. Dietary values of macroalgae *Porphyra haitanensis* in *Litopenaeus vannamei* under normal rearing and WSSV challenge conditions: Effect on growth, immune response and intestinal microbiota. *Fish & Shellfish Immunology* **81**, 135–149 (2018).
11. Ringø, E., Erik Olsen, R., Gonzalez Vecino, J. L. & Wadsworth, S. Use of Immunostimulants and Nucleotides in Aquaculture: A Review. *Journal of Marine Science: Research & Development* **02**, (2011).
12. Dawood, M.A., Koshio, S. and Esteban, M.Á. Beneficial roles of feed additives as immunostimulants in aquaculture: a review. *Reviews in Aquaculture*, *10(4)*, pp.950-974. (2018)
13. Gupta, S., Lokesh, J., Abdelhafiz, Y., Siriyappagouder, P., Pierre, R., Sørensen, M., Fernandes, J.M. and Kiron, V., Macroalga-Derived Alginate Oligosaccharide Alters Intestinal Bacteria of Atlantic Salmon. *Frontiers in Microbiology* **10**, (2019).
14. Azeredo, R., Machado, M., Kreuz, E., Wuertz, S., Oliva-Teles, A., Enes, P. and Costas, B. The European seabass (*Dicentrarchus labrax*) innate immunity and gut health are modulated by dietary plant-protein inclusion and prebiotic supplementation. *Fish & Shellfish Immunology* **60**, 78–87 (2017).

15. Perry, W. B., Lindsay, E., Payne, C. J., Brodie, C. & Kazlauskaitė, R. The role of the gut microbiome in sustainable teleost aquaculture. *Proceedings of the Royal Society B: Biological Sciences* **287**, 20200184 (2020).
16. Dehler, C. E., Secombes, C. J. & Martin, S. A. M. Environmental and physiological factors shape the gut microbiota of Atlantic salmon parr (*Salmo salar* L.). *Aquaculture* **467**, 149–157 (2017).
17. Li, T. Long, M., Ji, C., Shen, Z., Gatesoupe, F.J., Zhang, X., Zhang, Q., Zhang, L., Zhao, Y., Liu, X. and Li, A. Alterations of the gut microbiome of largemouth bronze gudgeon (*Coreius guichenoti*) suffering from furunculosis. *Scientific Reports* **6** (1), (2016).
18. Riera, J. L. & Baldo, L. Microbial co-occurrence networks of gut microbiota reveal community conservation and diet-associated shifts in cichlid fishes. *Animal Microbiome* **2**, 36 (2020).
19. Egerton, S., Culloty, S., Whooley, J., Stanton, C. & Ross, R. P. The Gut Microbiota of Marine Fish. *Frontiers in Microbiology* **9**, (2018).
20. Gallo, B. D., Farrell, J. M. & Leydet, B. F. Fish Gut Microbiome: A Primer to an Emerging Discipline in the Fisheries Sciences. *Fisheries* **45**, 271–282 (2020).
21. Riiser, E. S., Haverkamp, T.H., Borgan, Ø., Jakobsen, K.S., Jentoft, S. and Star, B. A Single Vibrionales 16S rRNA Oligotype Dominates the Intestinal Microbiome in Two Geographically Separated Atlantic cod Populations. *Front Microbiol* **9**, (2018).
22. Le Doujet, T., De Santi, C., Klemetsen, T., Hjerde, E., Willassen, N.P. and Haugen, P. Closely-related Photobacterium strains comprise the majority of bacteria in the gut of migrating Atlantic cod (*Gadus morhua*). *Microbiome* **7**, 64 (2019).
23. Keating, C. Bolton-Warberg, M., Hinchcliffe, J., Davies, R., Whelan, S., Wan, A.H.L., Fitzgerald, R.D., Davies, S.J., Ijaz, U.Z. and Smith, C.J. Temporal changes in the gut microbiota in farmed Atlantic cod (*Gadus morhua*) outweigh the response to diet supplementation with macroalgae. *Animal Microbiome* **3**, 7 (2021).
24. Lauzon, H. L. Gudmundsdottir, S., Steinarsson, A., Oddgeirsson, M., Petursdottir, S.K., Reynisson, E., Bjornsdottir, R. and Gudmundsdottir, B.K Effects of bacterial treatment at early stages of Atlantic cod (*Gadus morhua* L.) on larval survival and development. *Journal of Applied Microbiology* **108**, 624–632 (2010).
25. Mora, C., Chittaro, P. M., Sale, P. F., Kritzer, J. P. & Ludsin, S. A. Patterns and processes in reef fish diversity. *Nature* **421**, 933–936 (2003).

26. Caro, A. U., Navarrete, S. A. & Castilla, J. C. Ecological convergence in a rocky intertidal shore metacommunity despite high spatial variability in recruitment regimes. *PNAS* **107**, 18528–18532 (2010).
27. Pagaling, E., Vassileva, K., Mills, C.G., Bush, T., Blythe, R.A., Schwarz-Linek, J., Strathdee, F., Allen, R.J. and Free, A. Assembly of microbial communities in replicate nutrient-cycling model ecosystems follows divergent trajectories, leading to alternate stable states. *Environmental Microbiology* **19**, 3374–3386 (2017).
28. Vass, M., Székely, A. J., Lindström, E. S. & Langenheder, S. Using null models to compare bacterial and microeukaryotic metacommunity assembly under shifting environmental conditions. *Scientific Reports* **10**, (2020).
29. Stegen, J. C., Lin, X., Konopka, A. E. & Fredrickson, J. K. Stochastic and deterministic assembly processes in subsurface microbial communities. *The ISME Journal* **6**, 1653–1664 (2012).
30. Zhou, J. & Ning, D. Stochastic Community Assembly: Does It Matter in Microbial Ecology? *Microbiol Mol Biol Rev* **81**, e00002-17, e00002-17 (2017).
31. Verster, A. J. & Borenstein, E. Competitive lottery-based assembly of selected clades in the human gut microbiome. *Microbiome* **6**, 186 (2018).
32. Sprockett, D., Fukami, T. & Relman, D. A. Role of priority effects in the early-life assembly of the gut microbiota. *Nat Rev Gastroenterol Hepatol* **15**, 197–205 (2018).
33. Fukami, T. Historical Contingency in Community Assembly: Integrating Niches, Species Pools, and Priority Effects. *Annual Review of Ecology, Evolution, and Systematics* **46**, 1–23 (2015).
34. Urban, M. C. & Meester, L. D. Community monopolization: local adaptation enhances priority effects in an evolving metacommunity. *Proceedings of the Royal Society B: Biological Sciences*, 276(1676), pp.4129-4138. (2009).
35. Tucker, C. M., Shoemaker, L. G., Davies, K. F., Nemergut, D. R. & Melbourne, B. A. Differentiating between niche and neutral assembly in metacommunities using null models of  $\beta$ -diversity. *Oikos* **125**, 778–789 (2016).
36. Polunin, N. *Ecosystem theory and application*. (Wiley, 1986).
37. Bozzi, D. Rasmussen, J.A., Carøe, C., Sveier, H., Nordøy, K., Gilbert, M.T.P. and Limborg, M.T. Salmon gut microbiota correlates with disease infection status: potential for monitoring health in farmed animals. *Animal Microbiome* **3**(1), (2021).

38. Nayak, S. K. Role of gastrointestinal microbiota in fish. *Aquaculture Research* **41**, 1553–1573 (2010).
39. Ray, A. K., Ghosh, K. & Ringø, E. Enzyme-producing bacteria isolated from fish gut: a review. *Aquaculture Nutrition* **18**, 465–492 (2012).
40. Modin, O. *et al.* Hill-based dissimilarity indices and null models for analysis of microbial community assembly. *Microbiome* **8**, 132 (2020).
41. Heys, C., Cheaib, B., Buseti, A., Kazlauskaitė, R., Maier, L., Sloan, W.T., Ijaz, U.Z., Kaufmann, J., McGinnity, P. and Llewellyn, M.S. Neutral Processes Dominate Microbial Community Assembly in Atlantic Salmon, *Salmo salar*. *Applied and Environmental Microbiology* **86** (8), (2020).
42. Xiao, F., Zhu, W., Yu, Y., He, Z., Wu, B., Wang, C., Shu, L., Li, X., Yin, H., Wang, J. and Juneau, P. Host development overwhelms environmental dispersal in governing the ecological succession of zebrafish gut microbiota. *npj Biofilms Microbiomes* **7** (1). 1–12 (2021).
43. Burns, A. R., Stephens, W.Z., Stagaman, K., Wong, S., Rawls, J.F., Guillemin, K. and Bohannan, B.J. Contribution of neutral processes to the assembly of gut microbial communities in the zebrafish over host development. *ISME J* **10** (3), 655–664 (2016).
44. Ofiteru, I.D., Lunn, M., Curtis, T.P., Wells, G.F., Criddle, C.S., Francis, C.A. and Sloan, W.T. Combined niche and neutral effects in a microbial wastewater treatment community. *Proceedings of the National Academy of Sciences* **107** (35), 15345–15350 (2010).
45. López Nadal, A., Ikeda-Ohtsubo, W., Sipkema, D., Peggs, D., McGurk, C., Forlenza, M., Wiegertjes, G.F. and Brugman, S. Feed, Microbiota, and Gut Immunity: Using the Zebrafish Model to Understand Fish Health. *Frontiers in Immunology* **11**, 114 (2020).
46. Robinson, C.D., Klein, H.S., Murphy, K.D., Parthasarathy, R., Guillemin, K. and Bohannan, B.J. Experimental bacterial adaptation to the zebrafish gut reveals a primary role for immigration. *PLOS Biology* **16** (12), e2006893 (2018).
47. Vestrum, R. I., Attramadal, K. J. K., Vadstein, O., Gundersen, M. S. & Bakke, I. Bacterial community assembly in Atlantic cod larvae (*Gadus morhua*): contributions of ecological processes and metacommunity structure. *FEMS Microbiology Ecology* **96**, (2020).

48. Bakke, I., Coward, E., Andersen, T. & Vadstein, O. Selection in the host structures the microbiota associated with developing cod larvae (*Gadus morhua*): Ontogeny of cod larval microbiota. *Environ Microbiol* **17**, 3914–3924 (2015).
49. Vestrum, R. I., Attramadal, K.J., Winge, P., Li, K., Olsen, Y., Bones, A.M., Vadstein, O. and Bakke, I. Rearing Water Treatment Induces Microbial Selection Influencing the Microbiota and Pathogen Associated Transcripts of Cod (*Gadus morhua*) Larvae. *Frontiers in Microbiology*. **9**, (2018).
50. Stegen, J. C., Lin, X., Fredrickson, J. K. & Konopka, A. E. Estimating and mapping ecological processes influencing microbial community assembly. *Front. Microbiol.* **6**, (2015).
51. Riiser, E. S., Haverkamp, T.H., Varadharajan, S., Borgan, Ø., Jakobsen, K.S., Jentoft, S. and Star, B. Switching on the light: using metagenomic shotgun sequencing to characterize the intestinal microbiome of Atlantic cod. *Environmental Microbiology* **21** (7), 2576–2594 (2019).
52. Tarnecki, A. M., Burgos, F. A., Ray, C. L. & Arias, C. R. Fish intestinal microbiome: diversity and symbiosis unravelled by metagenomics. *Journal of Applied Microbiology* **123**, 2–17 (2017).
53. Parata, L., Mazumder, D., Sammut, J. & Egan, S. Diet type influences the gut microbiome and nutrient assimilation of Genetically Improved Farmed Tilapia (*Oreochromis niloticus*). *PLOS ONE* **15**, e0237775 (2020).
54. Petersen, C. & Round, J. L. Defining dysbiosis and its influence on host immunity and disease. *Cellular Microbiology* **16**, 1024–1033 (2014).
55. Eng, A. & Borenstein, E. Taxa-function robustness in microbial communities. *Microbiome* **6**, 45 (2018).
56. Shanahan, F., Ghosh, T. S. & O’Toole, P. W. The Healthy Microbiome—What Is the Definition of a Healthy Gut Microbiome? *Gastroenterology* **160**, 483–494 (2021).
57. Griffiths, R. I., Whiteley, A. S., O’Donnell, A. G. & Bailey, M. J. Rapid Method for Coextraction of DNA and RNA from Natural Environments for Analysis of Ribosomal DNA- and rRNA-Based Microbial Community Composition. *Applied and Environmental Microbiology* **66**, 5488–5491 (2000).
58. Caporaso, J. G. *et al.* Ultra-high-throughput microbial community analysis on the Illumina HiSeq and MiSeq platforms. *The ISME Journal* **6**, 1621–1624 (2012).

59. Clarke, K. R. & Ainsworth, M. A method of linking multivariate community structure to environmental variables. *Marine Ecology Progress Series* **92**, 205–219 (1993).
60. Taylor, M. (2014). sinkr: A collection of functions featured on the blog 'Me nugget'. R package version 1.0. Available at <https://github.com/marchtaylor/sinkr>. Accessed May, 2021.
61. Oksanen, J., Blanchet, F.G., Friendly, M., Kindt, R., Legendre, P., McGlinn, D., Minchin, P.R., O'Hara, R.B., Simpson, G.L., Solymos, P., M. Stevens, M.H.H., Szoecs, E., and Wagner, H. (2020). vegan: Community Ecology Package. R package version 2.5-7. <https://CRAN.R-project.org/package=vegan>
62. Lee, S.-H., Sorensen, J. W., Grady, K. L., Tobin, T. C. & Shade, A. Divergent extremes but convergent recovery of bacterial and archaeal soil communities to an ongoing subterranean coal mine fire. *The ISME Journal* **11**, 1447–1459 (2017).
63. Vellend, M. Conceptual Synthesis in Community Ecology. *The Quarterly Review of Biology* **85**, 183–206 (2010).
64. Stegen, J.C. Lin, X., Fredrickson, J.K., Chen, X., Kennedy, D.W., Murray, C.J., Rockhold, M.L. and Konopka, A. Quantifying community assembly processes and identifying features that impose them. *The ISME Journal* **7**, 2069–2079 (2013).
65. Fine, P. V. A. & Kembel, S. W. Phylogenetic community structure and phylogenetic turnover across space and edaphic gradients in western Amazonian tree communities. *Ecography* **34**, 552–565 (2011).
66. Chase, J. M., Kraft, N. J. B., Smith, K. G., Vellend, M. & Inouye, B. D. Using null models to disentangle variation in community dissimilarity from variation in  $\alpha$ -diversity. *Ecosphere* **2** (2), (2011).
67. Sale, P. F. Maintenance of High Diversity in Coral Reef Fish Communities. *The American Naturalist* **111**, 337–359 (1977).
68. Darcy, J.L. Washburne, A.D., Robeson, M.S., Prest, T., Schmidt, S.K. and Lozupone, C.A. A phylogenetic model for the recruitment of species into microbial communities and application to studies of the human microbiome. *The ISME Journal* **14**, 1359–1368 (2020).
69. Douglas, G.M., Maffei, V.J., Zaneveld, J.R., Yurgel, S.N., Brown, J.R., Taylor, C.M., Huttenhower, C. and Langille, M.G. PICRUSt2 for prediction of metagenome functions. *Nature Biotechnology* **38**, 685–688 (2020).

70. Bolyen, E., Rideout, J.R., Dillon, M.R., Bokulich, N.A., Abnet, C.C., Al-Ghalith, G.A., Alexander, H., Alm, E.J., Arumugam, M., Asnicar, F. and Bai, Y. Reproducible, interactive, scalable and extensible microbiome data science using QIIME 2. *Nature Biotechnology* **37**, 852–857 (2019).
71. Love, M. I., Huber, W. & Anders, S. Moderated estimation of fold change and dispersion for RNA-seq data with DESeq2. *Genome Biology* **15**, 550 (2014).
72. Darzi, Y., Letunic, I., Bork, P. & Yamada, T. iPath3. 0: interactive pathways explorer v3. *Nucleic acids research* **46**, W510–W513 (2018).

## 7. Acknowledgements

We dedicate this paper to Dr Richard Fitzgerald, a dear colleague and friend, 1957-2016. The authors also kindly acknowledge all staff at the Carna Research Station, National University of Ireland Galway, Carna, Co. Galway, Ireland for their technical assistance during the feed trial.

## 8. Funding

This study was part funded by the EIRCOD (Cod Broodstock and Breeding) project, under the Sea Change Strategy with the support of the Marine Institute and the Marine Research Sub-programme of Ireland's National Development Plan 2007–2013 co-funded by the European Regional Development Fund, and also NutraMara programme (Grant-Aid Agreement No. MFFRI/07/01) under the Sea Change Strategy with the support of Ireland's Marine Institute and the Department of Agriculture, Food and the Marine, funded under the National Development Plan 2007–2013, Ireland. CS was funded by Science Foundation Ireland & the Marie-Curie Action COFUND under Grant Number 11/SIRG/B2159 and a Royal Academy of Engineering-Scottish Water Research Chair Grant Number: RCSR1718643. UZI is supported by NERC, UK, NE/L011956/1.

## 9. Author Contributions

CK dissected the fish for microbiome sampling, DNA extraction optimisation and extractions on the gut content, bioinformatics, statistical analysis and data interpretation. MBW managed the feeding trial, coordinated sampling and data management of tank populations. JH and RD ran the feeding trial and assisted with sampling. SW ran the feeding trial and assisted with dissections for microbiome analysis. AHLW was responsible

for seaweed identification and collection, designed the test diets and feed analysis. UZI wrote the analysis scripts and performed the microbiota bioinformatic and statistical analysis, and data interpretation with CK. UZI and CK conceived the ecological assembly research question study. While CJS, RF, MBW, SJD and AHLW designed the experimental feeding-trial study. CK and UZI wrote the manuscript, which was reviewed and edited by all authors. RF was EIRCOD Project Coordinator. All authors made a substantial contribution towards the research study and all authors (except RF) approved the final manuscript.

## 10. Competing Interest Statement

The authors declare no competing interest.

## 11. Figure Legends

**Figure 1.** Principal coordinate analysis (PCoA) using Bray-Curtis dissimilarity of the gut microbiota of juvenile Atlantic cod (*Gadus morhua*) community composition based on Time in weeks (*Groups*: 0, 8, 12) and the dietary treatments (Week 0, CTRL, ULVA, ASCO\_N and ASCO\_LG). The ordination is constrained by super-imposing the subset of OTUs which roughly explained the same beta-diversity between samples as the full dataset of OTUs. Deviance in ordination space is explained by 24.5%. Variation accounted for by *Type*;  $R^2 = 0.098$ , \*\*\*  $P = 0.001$ . Variation accounted for by *Groups*;  $R^2 = 0.08644$ , \*\*\*  $P = 0.001$ .

**Figure 2.** Collated figures exploring the influence of stochastic, deterministic, niche and neutral ecological assembly and quantitative measures of specific ecological processes occurring in the hindgut microbial community of juvenile Atlantic cod (*Gadus morhua*). **a)** Observed Hill-based dissimilarity - $q_d$  (solid lines) and the null expectation (dashed line) based on 999 randomisations for treatment groups' pair-wise comparisons; **(i)** Week 0 versus Week 8 treatment groups (CTRL, ULVA, ASCO\_N and ASCO\_LG); **(ii)** Week 8 versus Week 12 treatment groups (CTRL, ULVA, ASCO\_N and ASCO\_LG). The x-axis can be interpreted as follows  $q = 0$ ; presence/absence i.e. Jaccard index,  $q = 1$ ; OTUs abundances are weighted i.e., Bray-Curtis and  $q = >1$ ; OTUs with greater relative abundance have increased weighting; **b)** The relative changes in niche and neutral processes assessed using deviations from phylogeny abundance-weighted – Generalised Unifrac beta null model for treatment groups (CTRL, ULVA, ASCO\_N and ASCO\_LG) over time (Week 8 and Week 12) and including the base-line time-point Week 0. Lines connecting categories shows were significant (ANOVA) with \* ( $p < 0.05$ ), \*\* ( $p < 0.01$ ), or \*\*\* ( $p < 0.001$ ). **c)** Stacked bar-chart showing the percentage contribution of homogenising selection, variable selection, dispersal limitation, homogenising dispersal and undominated microbial community assembly processes for Week 0 and the treatment groups (CTRL, ULVA, ASCO\_N and ASCO\_LG) over time (Week 8 and Week 12). Note that the y-axes values in each plot in the collated figure differ.



**Figure 3.** Examination of species colonisation (Competitive lottery model) and species succession (Phylogenetic recruitment model). **a)** Competitive lottery model highlighting the genera with operational taxonomic units (OTUs) showing lottery-like behaviour in Week 0, Week 8, and Week 12 groups. Winner prevalence (percentage abundance of lottery winners across samples) is plotted on the x-axis and winner diversity (count of winning OTUs within a genus across samples) on the y-axis. In the case of high winner diversity, multiple OTUs can show up as winners within a genus, when winner diversity is low a single OTU is highlighted as a winner in the genus. The arrows show the temporal changes in diversity/prevalence of a specific genus. Table of winning OTUs is included in Supplementary File 1. **b)** Phylogenetic recruitment of species over time (Week 8 and Week 12) in the CTRL, ULVA, ASCO\_N and ASCO\_LG groups. Each violin plot shows the distribution of Dispersion estimates (D) given by logistic error model bootstraps.

**Figure 4.** Taxa-function robustness in the Atlantic cod hindgut microbiome compared across Treatments and Time (Groups: Week 0, CTRL\_08, CTRL\_12, ULVA\_08, ULVA\_12, ASCO\_N\_08, ASCO\_N\_12, ASCO\_LG\_08 and ASCO\_LG\_12). **a)** The attenuation values for each group. **b)** The buffering values for each group. **c)** Principal co-ordinate analysis plot of the five gene distribution factors compared across group (Week 0, CTRL, ULVA, ASCO\_N and ASCO\_LG) over time (Week 0, Week 8 and Week 12). Lines connecting categories shows were significant (ANOVA) with \* ( $p < 0.05$ ), \*\* ( $p < 0.01$ ), or \*\*\* ( $p < 0.001$ ).

**Figure 5.** Taxa-function robustness in the Atlantic cod hindgut microbiome compared across treatments and time (Groups: Week 0, CTRL\_08, CTRL\_12, ULVA\_08, ULVA\_12, ASCO\_N\_08, ASCO\_N\_12, ASCO\_LG\_08 and ASCO\_LG\_12) for specific microbial superpathway functions. Functions are highlighted as being involved in metabolism (purple box) or cell functioning (orange box). **a)** The specific-robustness attenuation functions that were statistically significant between groups. **b)** The specific-robustness buffering functions that were statistically significant between groups. Lines connecting categories shows were significant (ANOVA) with \* ( $p < 0.05$ ), \*\* ( $p < 0.01$ ), or \*\*\* ( $p < 0.001$ ) or NS (not significant).

**Figure S1.** KEGG orthologs and pathway predictions from the 16S rRNA gene sequencing of the gut microbiome from juvenile Atlantic cod using PICRUSt2 predictive functions<sup>69</sup>. The figure shows the Metacyc pathways drawn in iPath3<sup>72</sup> which are significantly different at a log<sub>2</sub> fold change ( $P < 0.05$ ) from Week 0 (red) and Week 12 (green).

**Figure S2.** Taxa-function robustness in the Atlantic cod hindgut microbiome compared across time excluding the ASCO samples (Groups: Week 0, Week 8 [CTRL and ULVA] and Week 12 [CTRL and ULVA]). **a)** The attenuation values for each time group. **b)** The specific-robustness attenuation functions that were statistically significant between time groups. **c)** The buffering values for each time group. **d)** Principal co-ordinate analysis plot of the five gene distribution factors compared across time group (Week 0, Week 8 and Week 12). Treatment group is indicated in symbols (Square = CTRL, Circle = ULVA, and Triangle (Week 0)). Lines connecting categories shows were significant (ANOVA) with \* ( $p < 0.05$ ), \*\* ( $p < 0.01$ ), or \*\*\* ( $p < 0.001$ ).

## 12. Supplementary Information

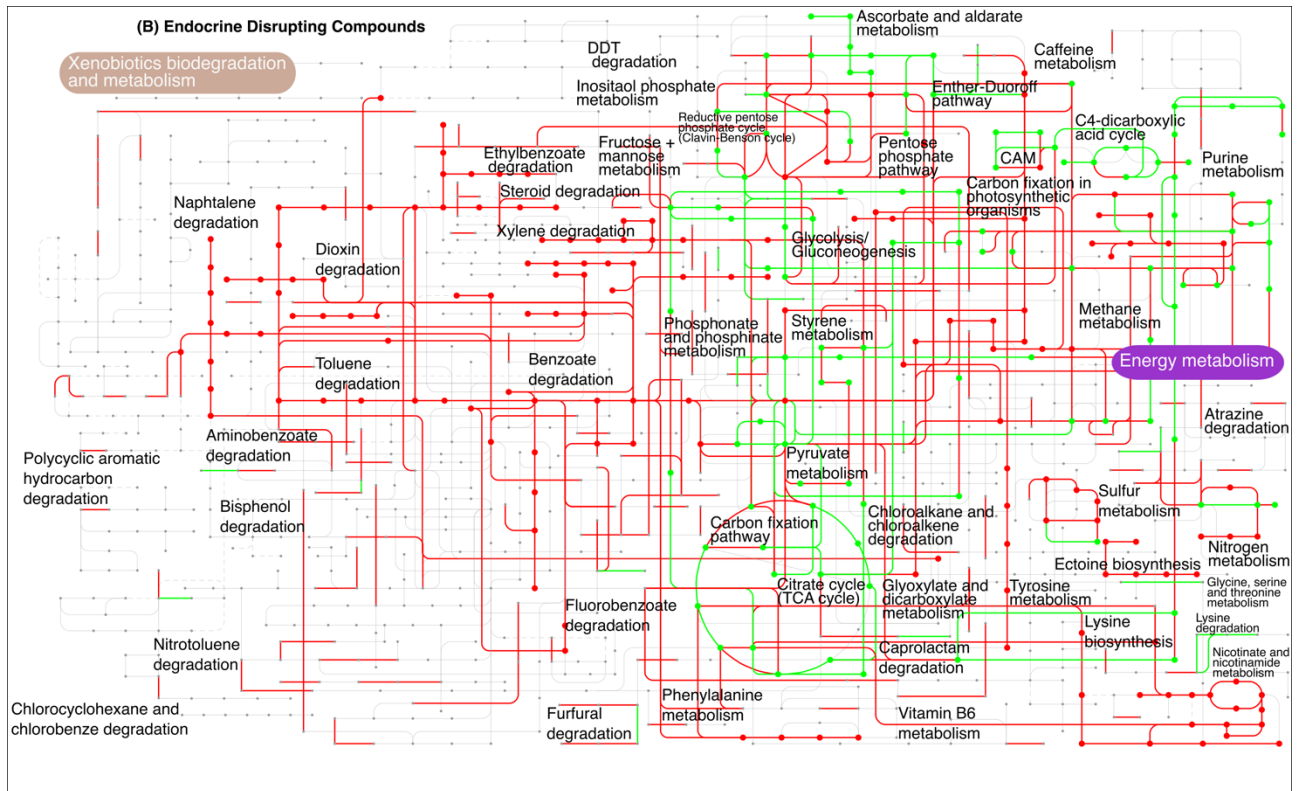

**Figure S1.** KEGG orthologs and pathway predictions from the 16S rRNA gene sequencing of the gut microbiome from juvenile Atlantic cod using PICRUSt2 predictive functions<sup>69</sup>. The figure shows the Metacyc pathways drawn in iPath3<sup>72</sup> which are significantly different at a log<sub>2</sub> fold change ( $P < 0.05$ ) from Week 0 (red) and Week 12 (green).

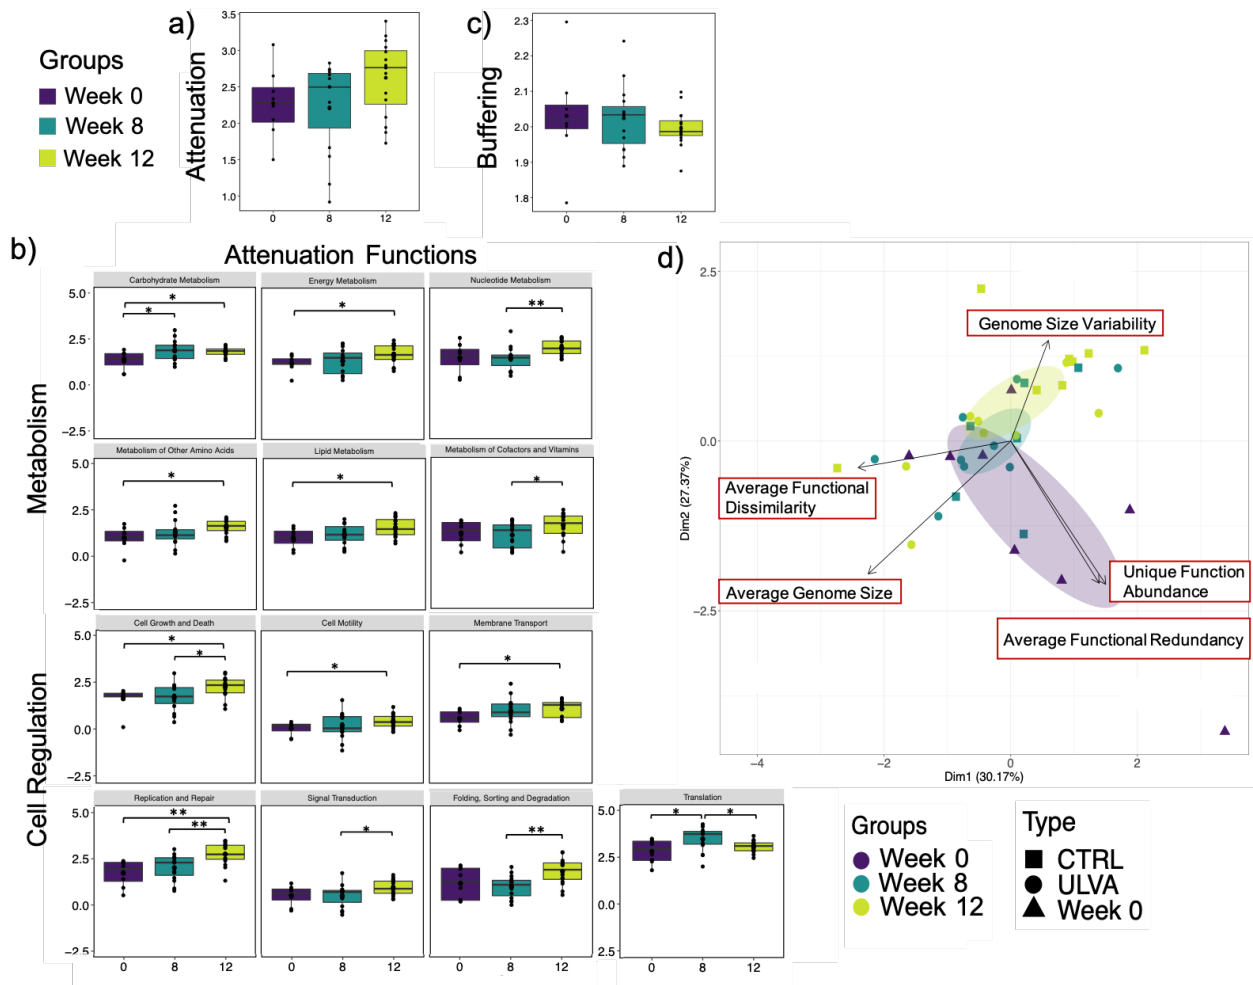

**Figure S2.** Taxa-function robustness in the Atlantic cod hindgut microbiome compared across time excluding the ASCO samples (Groups: Week 0, Week 8 [CTRL and ULVA] and Week 12 [CTRL and ULVA]). **a)** The attenuation values for each time group. **b)** The specific-robustness attenuation functions that were statistically significant between time groups. **c)** The buffering values for each time group. **d)** Principal co-ordinate analysis plot of the five gene distribution factors compared across time group (Week 0, Week 8 and Week 12). Treatment group is indicated in symbols (Square = CTRL, Circle = ULVA, and Triangle = Week 0). Lines connecting categories shows were significant (ANOVA) with \* ( $p < 0.05$ ), \*\* ( $p < 0.01$ ), or \*\*\* ( $p < 0.001$ ).

**Table S1.** Table showing the ‘lottery’ winners in genus clade groups (OTUs with > 90% within the clade). The table shows the genus name, time group, winner prevalence in samples and the normalised winner diversity and the identity of the winning OTUs.

| Clade                     | Groups | Winner prevalence | Normalised Winner diversity | Winners                                                                                                                                                                                                  |
|---------------------------|--------|-------------------|-----------------------------|----------------------------------------------------------------------------------------------------------------------------------------------------------------------------------------------------------|
| <i>Rikenella</i>          | 0      | 0.5               | 0                           | OTU_41: Bacteria; Bacteroidetes; Bacteroidia; Bacteroidales; Rikenellaceae; Rikenella;                                                                                                                   |
| <i>Rikenella</i>          | 8      | 0.666666667       | 0                           | OTU_41: Bacteria; Bacteroidetes; Bacteroidia; Bacteroidales; Rikenellaceae; Rikenella;                                                                                                                   |
| <i>Rikenella</i>          | 12     | 0.625             | 0.295903274                 | OTU_41: Bacteria; Bacteroidetes; Bacteroidia; Bacteroidales; Rikenellaceae; Rikenella;<br>OTU_37: Bacteria; Bacteroidetes; Bacteroidia; Bacteroidales; Rikenellaceae; Rikenella;                         |
| <i>Bacteroides</i>        | 0      | 0.857142857       | 0.231542658                 | OTU_9: Bacteria; Bacteroidetes; Bacteroidia; Bacteroidales; Bacteroidaceae; Bacteroides;<br>OTU_2969: Bacteria; Bacteroidetes; Bacteroidia; Bacteroidales; Bacteroidaceae; Bacteroides;                  |
| <i>Bacteroides</i>        | 8      | 0.666666667       | 0                           | OTU_9: Bacteria; Bacteroidetes; Bacteroidia; Bacteroidales; Bacteroidaceae; Bacteroides;                                                                                                                 |
| <i>Bacteroides</i>        | 12     | 0.466666667       | 0                           | OTU_9: Bacteria; Bacteroidetes; Bacteroidia; Bacteroidales; Bacteroidaceae; Bacteroides;                                                                                                                 |
| <i>Tyzzarella</i>         | 0      | 0.833333333       | 0.360964047                 | OTU_23: Bacteria; Firmicutes; Clostridia; Clostridiales; Lachnospiraceae; Tyzzarella;<br>OTU_153: Bacteria; Firmicutes; Clostridia; Clostridiales; Lachnospiraceae; Tyzzarella;                          |
| <i>Tyzzarella</i>         | 8      | 0.8               | 0.271782222                 | OTU_23: Bacteria; Firmicutes; Clostridia; Clostridiales; Lachnospiraceae; Tyzzarella;<br>OTU_153: Bacteria; Firmicutes; Clostridia; Clostridiales; Lachnospiraceae; Tyzzarella;                          |
| <i>Tyzzarella</i>         | 12     | 0.714285714       | 0.234497797                 | OTU_23: Bacteria; Firmicutes; Clostridia; Clostridiales; Lachnospiraceae; Tyzzarella;<br>OTU_90: Bacteria; Firmicutes; Clostridia; Clostridiales; Lachnospiraceae; Tyzzarella;                           |
| <i>Macellibacteroides</i> | 0      | 0.5               | 0                           | OTU_2550: Bacteria; Bacteroidetes; Bacteroidia; Bacteroidales; Porphyromonadaceae; Macellibacteroides;                                                                                                   |
| <i>Macellibacteroides</i> | 8      | 0.25              | 0                           | OTU_2550: Bacteria; Bacteroidetes; Bacteroidia; Bacteroidales; Porphyromonadaceae; Macellibacteroides;                                                                                                   |
| <i>Macellibacteroides</i> | 12     | 0.066666667       | 0                           | OTU_2550: Bacteria; Bacteroidetes; Bacteroidia; Bacteroidales; Porphyromonadaceae; Macellibacteroides;                                                                                                   |
| <i>Fusobacterium</i>      | 0      | 0.833333333       | 0.455485915                 | OTU_3155: Bacteria; Fusobacteria; Fusobacteriia; Fusobacteriales; Fusobacteriaceae; Fusobacterium;<br>OTU_2525: Bacteria; Fusobacteria; Fusobacteriia; Fusobacteriales; Fusobacteriaceae; Fusobacterium; |
| <i>Fusobacterium</i>      | 8      | 0.416666667       | 0.455485915                 | OTU_2525: Bacteria; Fusobacteria; Fusobacteriia; Fusobacteriales; Fusobacteriaceae; Fusobacterium;                                                                                                       |

|                                      |    |             |             |                                                                                                                                                                                                                                                                                                               |
|--------------------------------------|----|-------------|-------------|---------------------------------------------------------------------------------------------------------------------------------------------------------------------------------------------------------------------------------------------------------------------------------------------------------------|
|                                      |    |             |             | OTU_3155: Bacteria; Fusobacteria; Fusobacteriia; Fusobacteriales; Fusobacteriaceae; Fusobacterium;                                                                                                                                                                                                            |
| <i>Fusobacterium</i>                 | 12 | 0.142857143 | 0           | OTU_2525: Bacteria; Fusobacteria; Fusobacteriia; Fusobacteriales; Fusobacteriaceae; Fusobacterium;                                                                                                                                                                                                            |
| <i>Lachnoclostridium</i>             | 0  | 0.8         | 0           | OTU_2624: Bacteria; Firmicutes; Clostridia; Clostridiales; Lachnospiraceae; Lachnoclostridium;                                                                                                                                                                                                                |
| <i>Lachnoclostridium</i>             | 8  | 0.285714286 | 0.5         | OTU_2624: Bacteria; Firmicutes; Clostridia; Clostridiales; Lachnospiraceae; Lachnoclostridium;<br>OTU_130: Bacteria; Firmicutes; Clostridia; Clostridiales; Lachnospiraceae; Lachnoclostridium;                                                                                                               |
| <i>Lachnoclostridium</i>             | 12 | 0.5         | 0.271782222 | OTU_2624: Bacteria; Firmicutes; Clostridia; Clostridiales; Lachnospiraceae; Lachnoclostridium;<br>OTU_130: Bacteria; Firmicutes; Clostridia; Clostridiales; Lachnospiraceae; Lachnoclostridium;                                                                                                               |
| <i>Alistipes</i>                     | 0  | 0.8         | 0.646014837 | OTU_34: Bacteria; Bacteroidetes; Bacteroidia; Bacteroidales; Rikenellaceae; Alistipes;<br>OTU_20: Bacteria; Bacteroidetes; Bacteroidia; Bacteroidales; Rikenellaceae; Alistipes;<br>OTU_3429: Bacteria; Bacteroidetes; Bacteroidia; Bacteroidales; Rikenellaceae; Alistipes;                                  |
| <i>Alistipes</i>                     | 8  | 0.25        | 0           | OTU_3429: Bacteria; Bacteroidetes; Bacteroidia; Bacteroidales; Rikenellaceae; Alistipes;                                                                                                                                                                                                                      |
| <i>Alistipes</i>                     | 12 | 0.066666667 | 0           | OTU_62: Bacteria; Bacteroidetes; Bacteroidia; Bacteroidales; Rikenellaceae; Alistipes;                                                                                                                                                                                                                        |
| <i>Erysipelatoclostridium</i>        | 8  | 0.166666667 | 0           | OTU_2180: Bacteria; Firmicutes; Erysipelotrichia; Erysipelotrichales; Erysipelotrichaceae; Erysipelatoclostridium;                                                                                                                                                                                            |
| <i>Cetobacterium</i>                 | 0  | 1           | 0.459147917 | OTU_2113: Bacteria; Fusobacteria; Fusobacteriia; Fusobacteriales; Fusobacteriaceae; Cetobacterium;<br>OTU_355: Bacteria; Fusobacteria; Fusobacteriia; Fusobacteriales; Fusobacteriaceae; Cetobacterium;                                                                                                       |
| <i>Cetobacterium</i>                 | 8  | 0.5         | 0           | OTU_2113: Bacteria; Fusobacteria; Fusobacteriia; Fusobacteriales; Fusobacteriaceae; Cetobacterium;                                                                                                                                                                                                            |
| <i>Cetobacterium</i>                 | 12 | 0.444444444 | 0.75        | OTU_3117: Bacteria; Fusobacteria; Fusobacteriia; Fusobacteriales; Fusobacteriaceae; Cetobacterium;<br>OTU_355: Bacteria; Fusobacteria; Fusobacteriia; Fusobacteriales; Fusobacteriaceae; Cetobacterium;<br>OTU_2113: Bacteria; Fusobacteria; Fusobacteriia; Fusobacteriales; Fusobacteriaceae; Cetobacterium; |
| <i>[Anaerorhabdus] furcosa group</i> | 0  | 0.285714286 | 0           | OTU_3118: Bacteria; Firmicutes; Erysipelotrichia; Erysipelotrichales; Erysipelotrichaceae; [Anaerorhabdus] furcosa group; Erysipelotrichaceae feline oral taxon 121;                                                                                                                                          |
| <i>[Anaerorhabdus] furcosa group</i> | 8  | 0.222222222 | 0           | OTU_3118: Bacteria; Firmicutes; Erysipelotrichia; Erysipelotrichales; Erysipelotrichaceae; [Anaerorhabdus] furcosa group; Erysipelotrichaceae feline oral taxon 121;                                                                                                                                          |

|                                      |    |                 |                 |                                                                                                                                                                                                                                                                                                   |
|--------------------------------------|----|-----------------|-----------------|---------------------------------------------------------------------------------------------------------------------------------------------------------------------------------------------------------------------------------------------------------------------------------------------------|
| <i>[Anaerorhabdus] furcosa group</i> | 12 | 0.36363636<br>4 | 0.51185950<br>7 | OTU_3282: Bacteria; Firmicutes; Erysipelotrichia; Erysipelotrichales; Erysipelotrichaceae; [Anaerorhabdus] furcosa group;<br>OTU_3118: Bacteria; Firmicutes; Erysipelotrichia; Erysipelotrichales; Erysipelotrichaceae; [Anaerorhabdus] furcosa group; Erysipelotrichaceae feline oral taxon 121; |
|--------------------------------------|----|-----------------|-----------------|---------------------------------------------------------------------------------------------------------------------------------------------------------------------------------------------------------------------------------------------------------------------------------------------------|
